# Supplementary material for: Adamantane-Substituted Purines and Their β-Cyclodextrin Complexes: Synthesis and Biological Activity
Source: MDPI journal article supplement (doi:10.3390/ijms222312675), 2021-11-24
Supplement: s1 [file s1]

# Adamantane-substituted purines and their $\beta$ -cyclodextrin complexes: Synthesis and biological activity

Michal Rouchal<sup>a</sup>, Jana Rudolfová<sup>a</sup>, Vladimír Kryštof<sup>b</sup>, Veronika Vojáčková<sup>b</sup>, Richard

Čmelík<sup>c</sup>, and Robert Vích<sup>a,\*</sup>

<sup>a</sup> *Department of Chemistry, Faculty of Technology, Tomas Bata University in Zlín, Vavrečkova 275, 760 01 Zlín, Czech Republic*

<sup>b</sup> *Department of Experimental Biology, Palacký University, Šlechtitelů 27, 783 71 Olomouc, Czech Republic*

<sup>c</sup> *Institute of Analytical Chemistry, v.v.i., Academy of Sciences of the Czech Republic, Veveří 97, 602 00 Brno, Czech Republic*

\*Corresponding author: email: rvicha@utb.cz

## *Supporting Information*

### **Table of Contents**

|                                                                           |     |
|---------------------------------------------------------------------------|-----|
| NMR and MS spectra of compounds <b>4a–k</b>                               | S2  |
| ESI-MS spectra of equimolar mixtures of purines <b>4</b> with $\beta$ -CD | S22 |
| Molecular docking results                                                 | S32 |

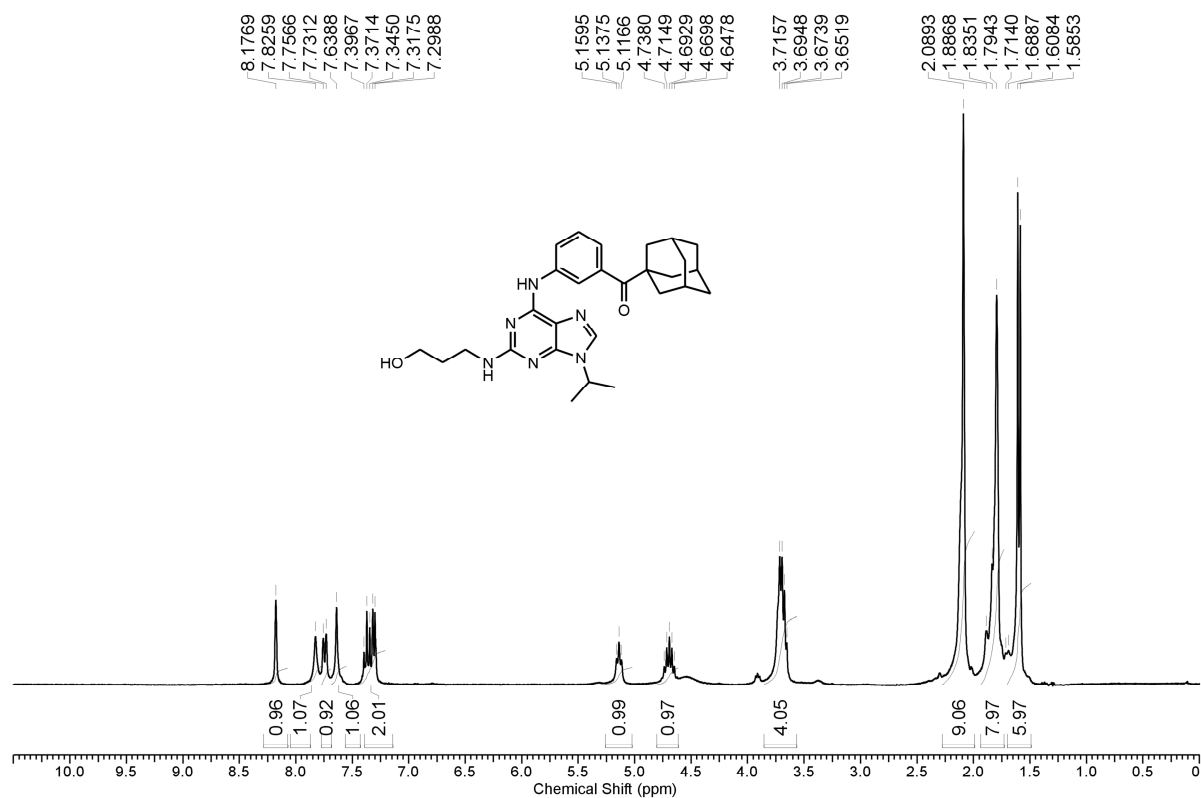

**Figure S1** <sup>1</sup>H NMR spectrum (CDCl<sub>3</sub>, 300 MHz, 303 K) of compound **4a**.

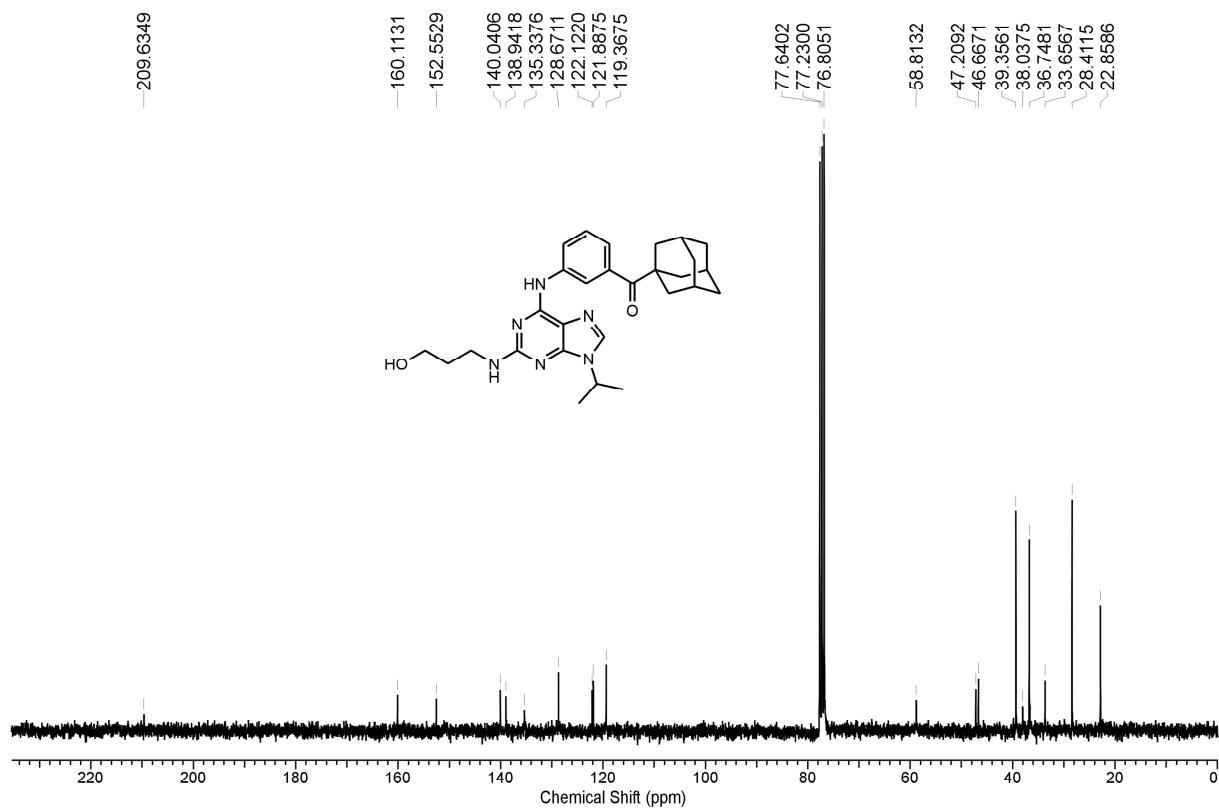

**Figure S2** <sup>13</sup>C NMR spectrum (CDCl<sub>3</sub>, 75 MHz, 303 K) of compound **4a**.

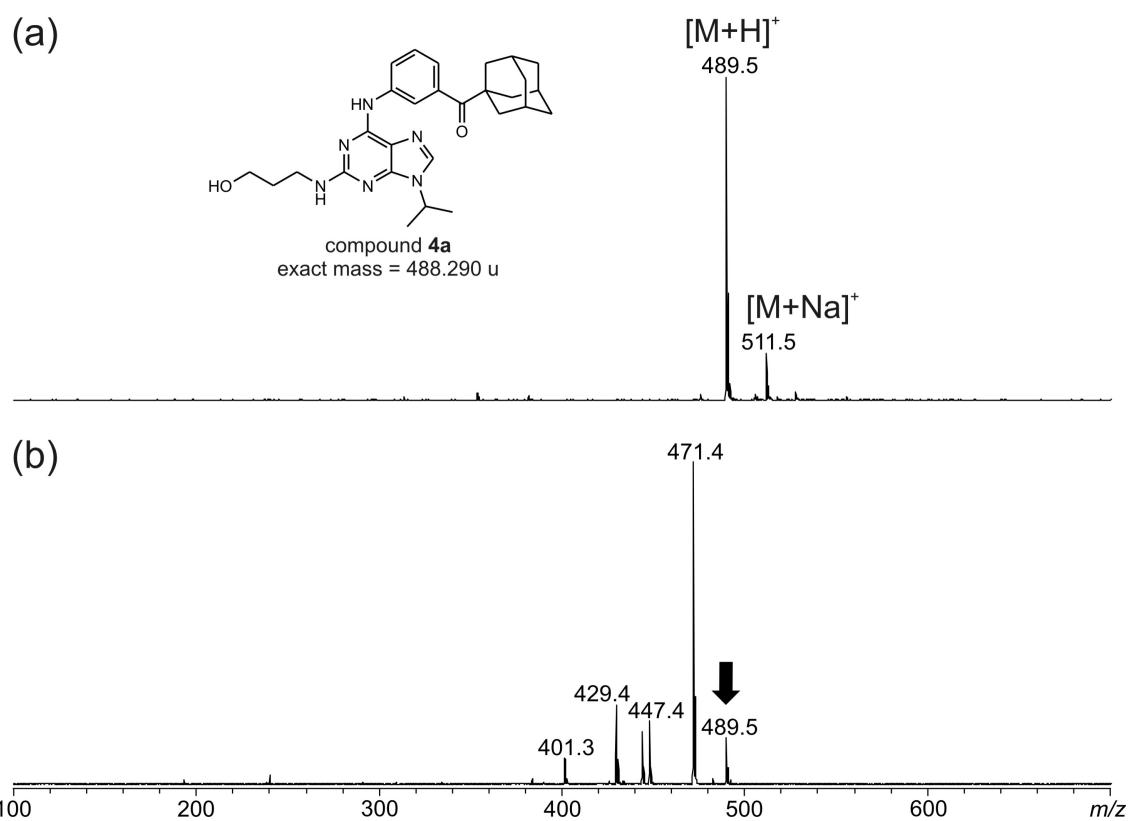

**Figure S3** Positive-ion mode ESI mass spectra (full scan) of compound **4a**; (a) first-order mass spectra, (b) MS/MS of  $m/z$  489. The assignments for the observed ions are shown in the brackets. The fragmented ion in tandem mass spectrum is marked with bold, downward arrow.

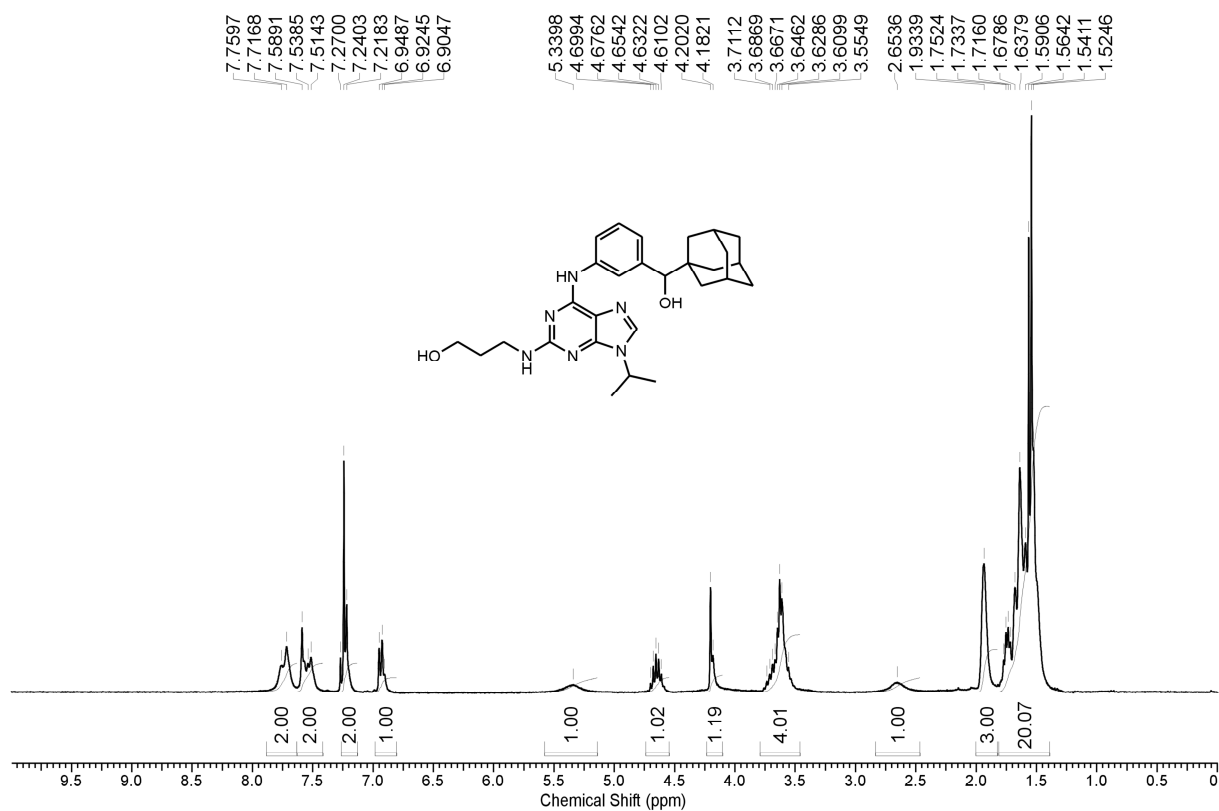

**Figure S4** <sup>1</sup>H NMR spectrum (CDCl<sub>3</sub>, 300 MHz, 303 K) of compound **4b**.

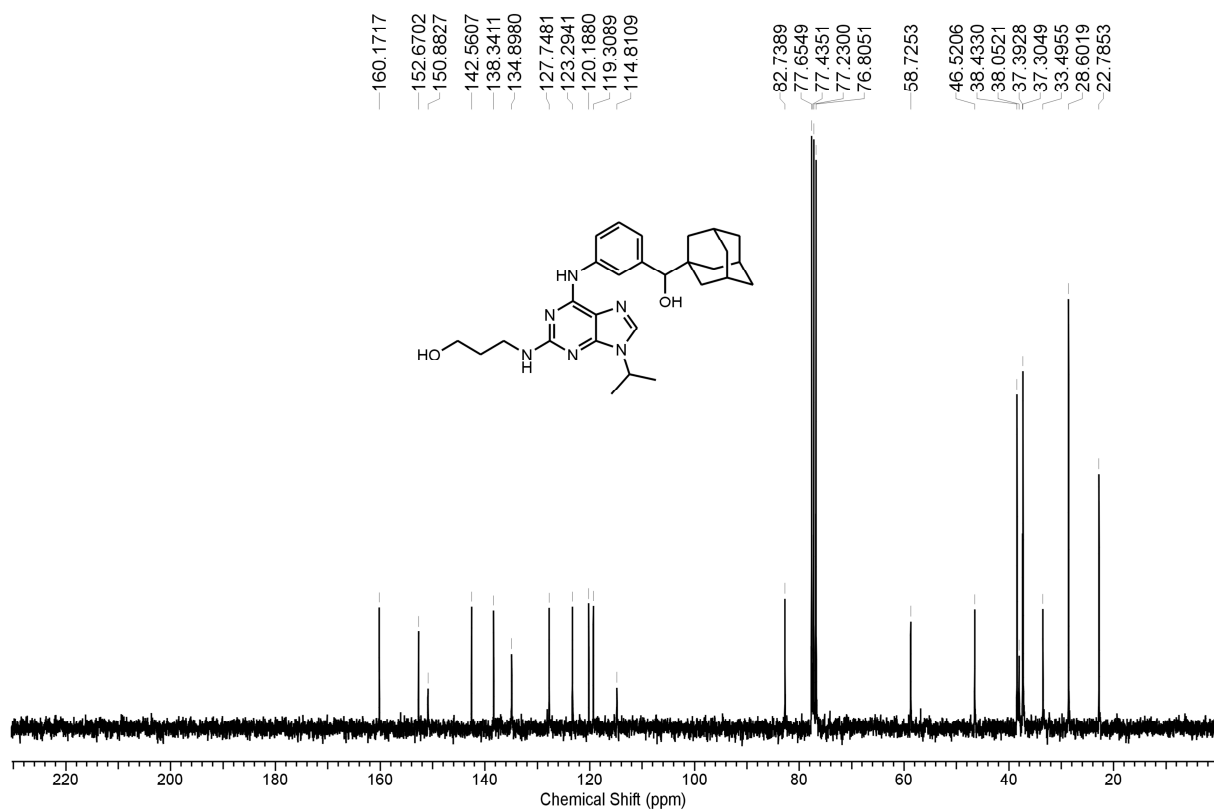

**Figure S5** <sup>13</sup>C NMR spectrum (CDCl<sub>3</sub>, 75 MHz, 303 K) of compound **4b**.



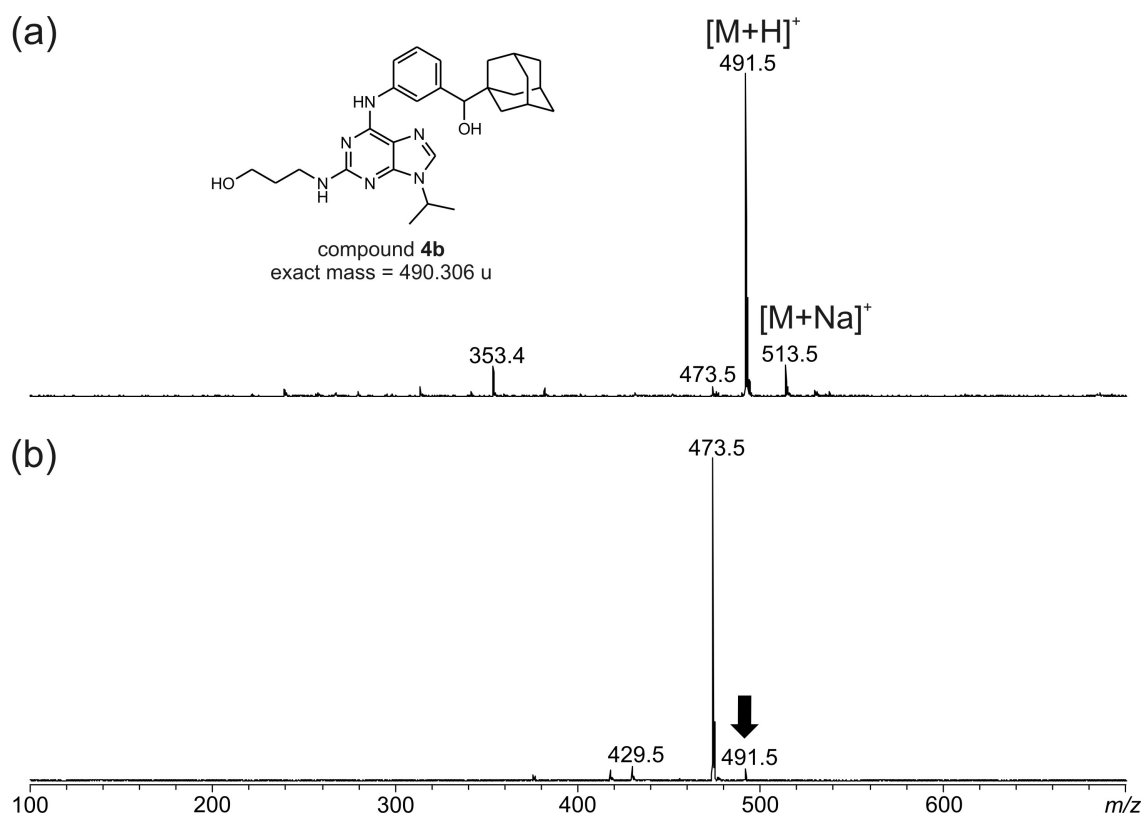

**Figure S6** Positive-ion mode ESI mass spectra (full scan) of compound **4b**; (a) first-order mass spectra, (b) MS/MS of  $m/z$  491. The assignments for the observed ions are shown in the brackets. The fragmented ion in tandem mass spectrum is marked with bold, downward arrow.

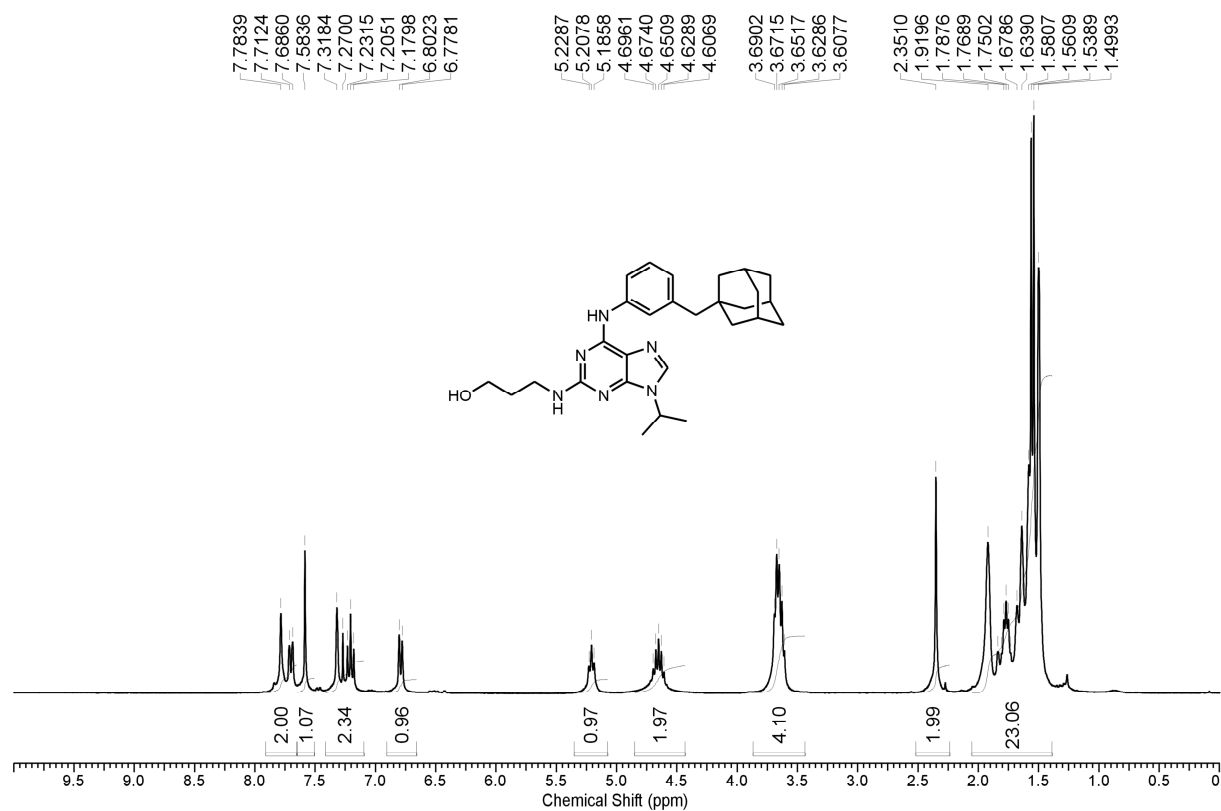

**Figure S7** <sup>1</sup>H NMR spectrum (CDCl<sub>3</sub>, 300 MHz, 303 K) of compound **4c**.

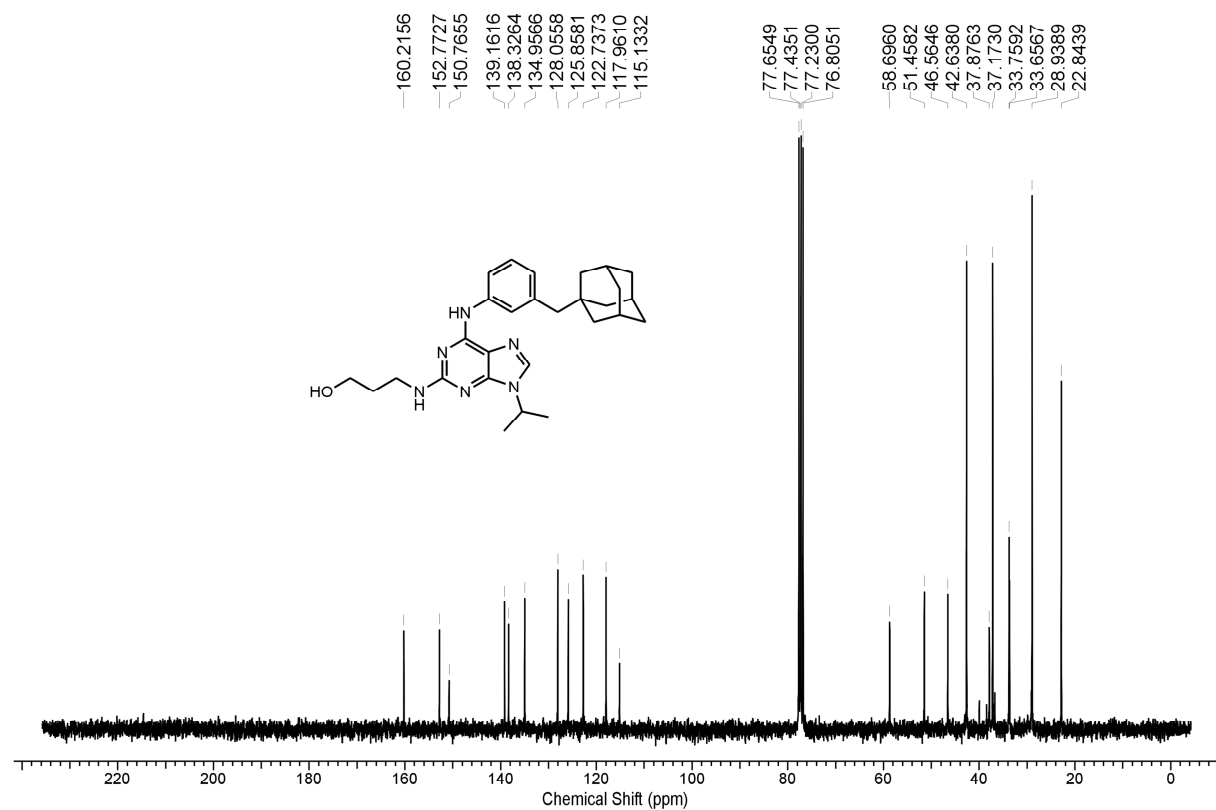

**Figure S8** <sup>13</sup>C NMR spectrum (CDCl<sub>3</sub>, 75 MHz, 303 K) of compound **4c**.

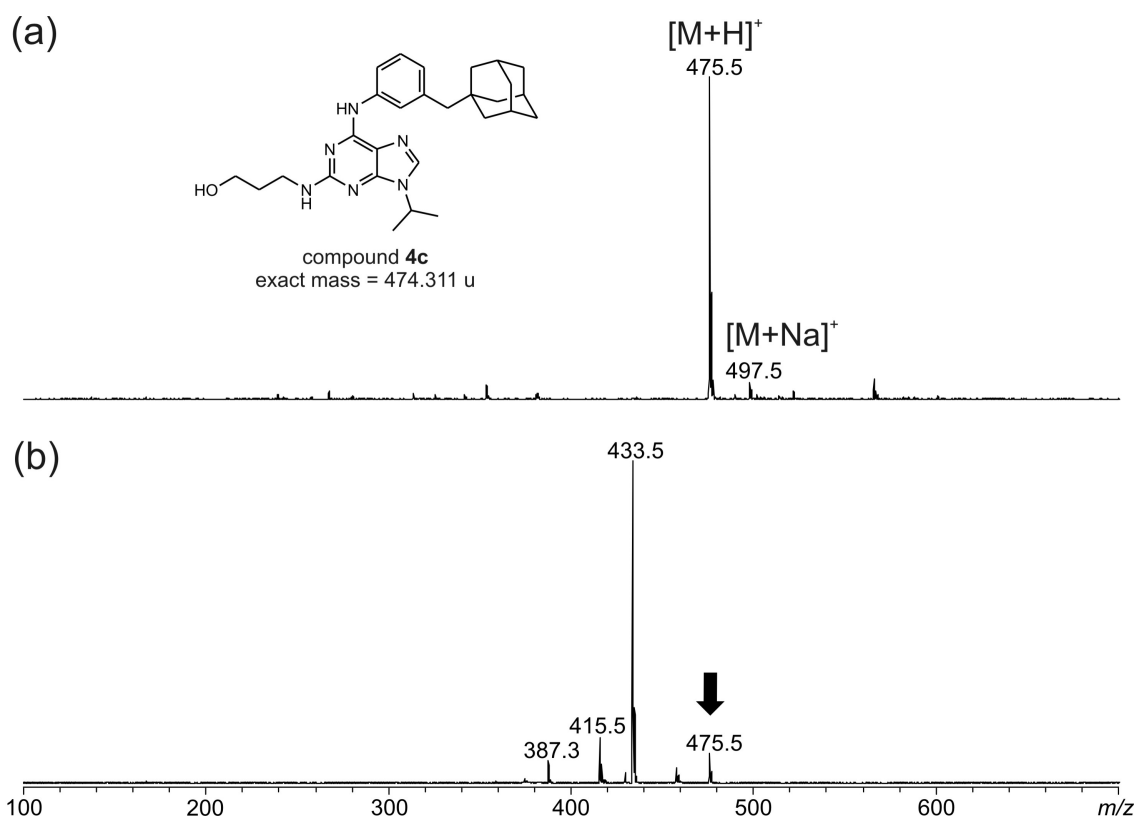

**Figure S9** Positive-ion mode ESI mass spectra (full scan) of compound **4c**; (a) first-order mass spectra, (b) MS/MS of  $m/z$  475. The assignments for the observed ions are shown in the brackets. The fragmented ion in tandem mass spectrum is marked with bold, downward arrow.

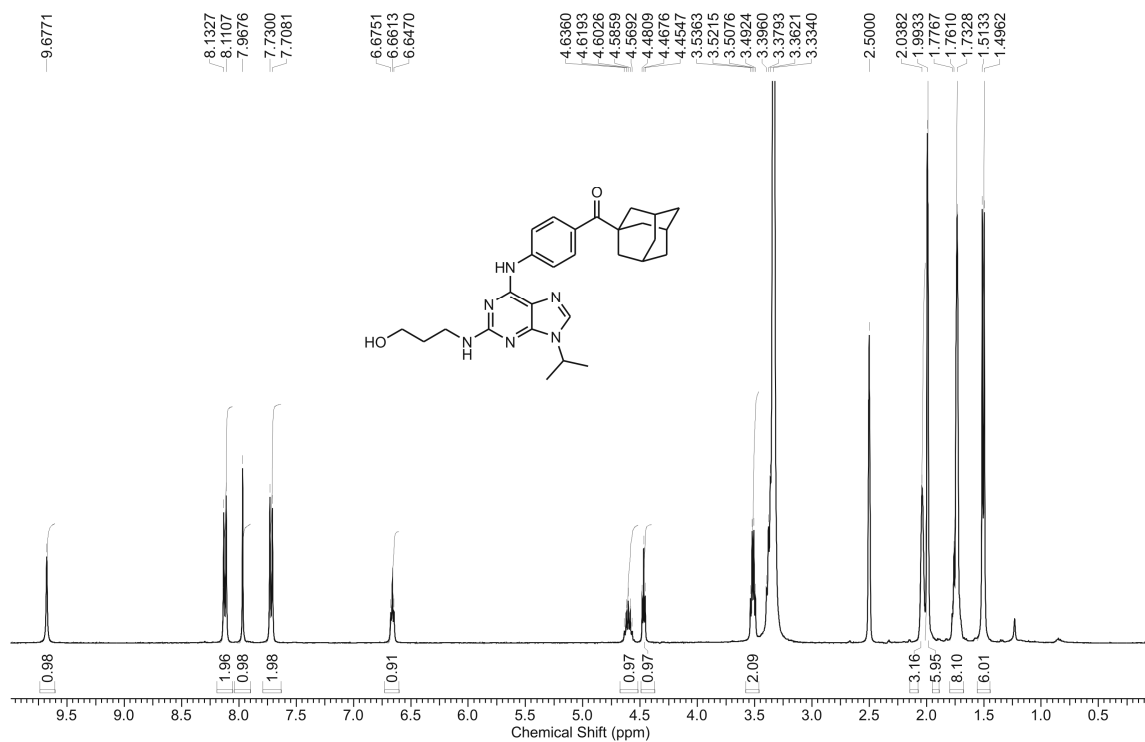

**Figure S10** <sup>1</sup>H NMR spectrum (DMSO-*d*<sub>6</sub>, 400 MHz, 303 K) of compound **4d**.

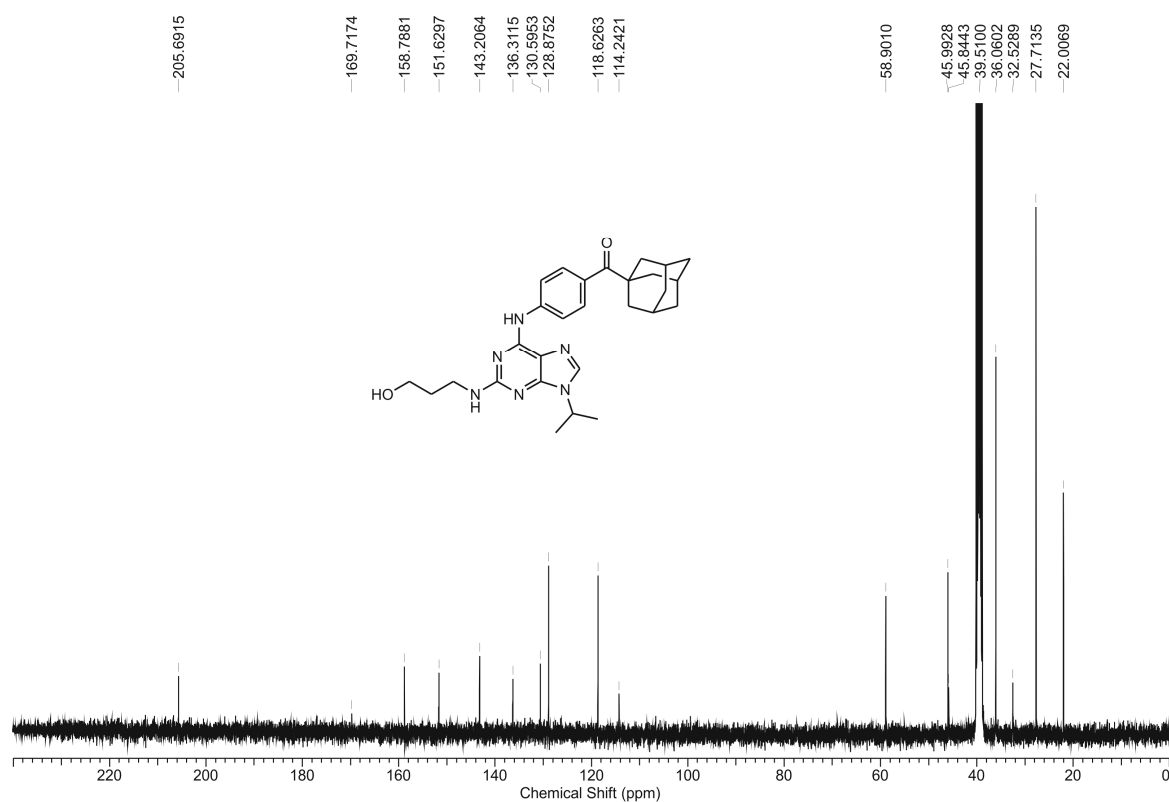

**Figure S11** <sup>13</sup>C NMR spectrum (DMSO-*d*<sub>6</sub>, 101 MHz, 303 K) of compound **4d**.

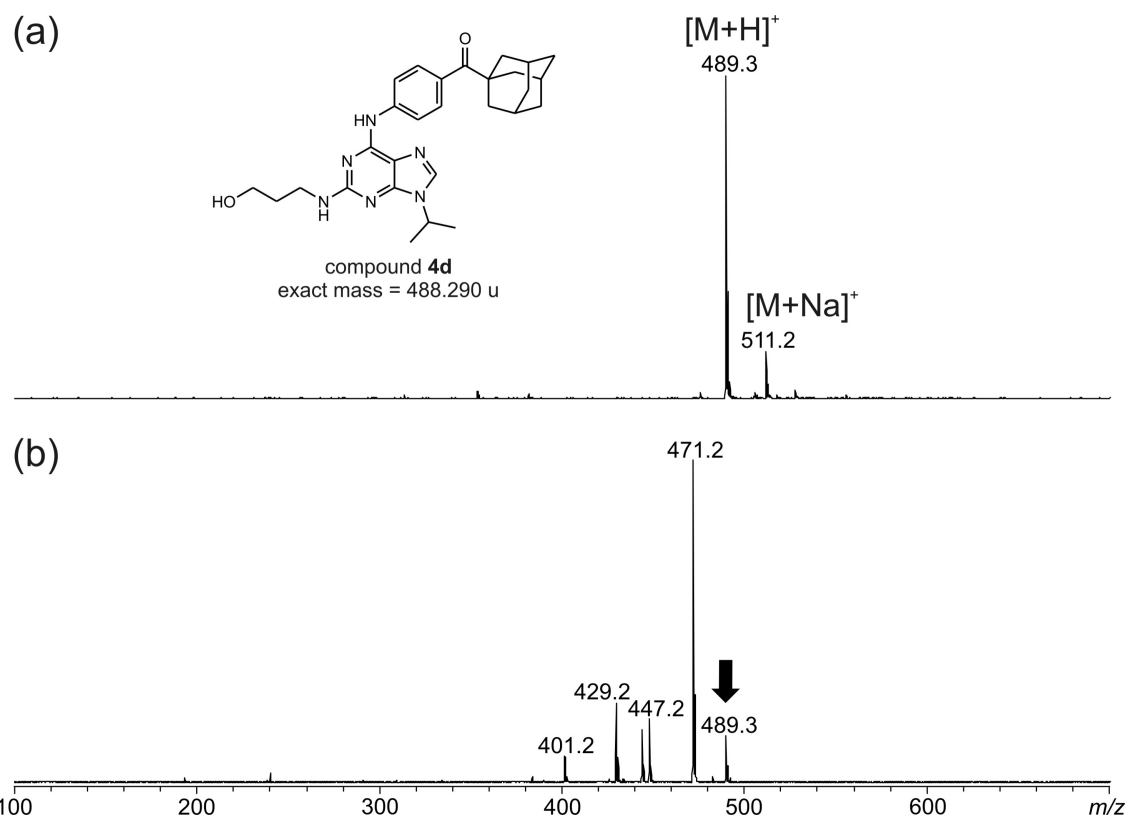

**Figure S12** Positive-ion mode ESI mass spectra (full scan) of compound **4d**; (a) first-order mass spectra, (b) MS/MS of  $m/z$  489. The assignments for the observed ions are shown in the brackets. The fragmented ion in tandem mass spectrum is marked with bold, downward arrow.

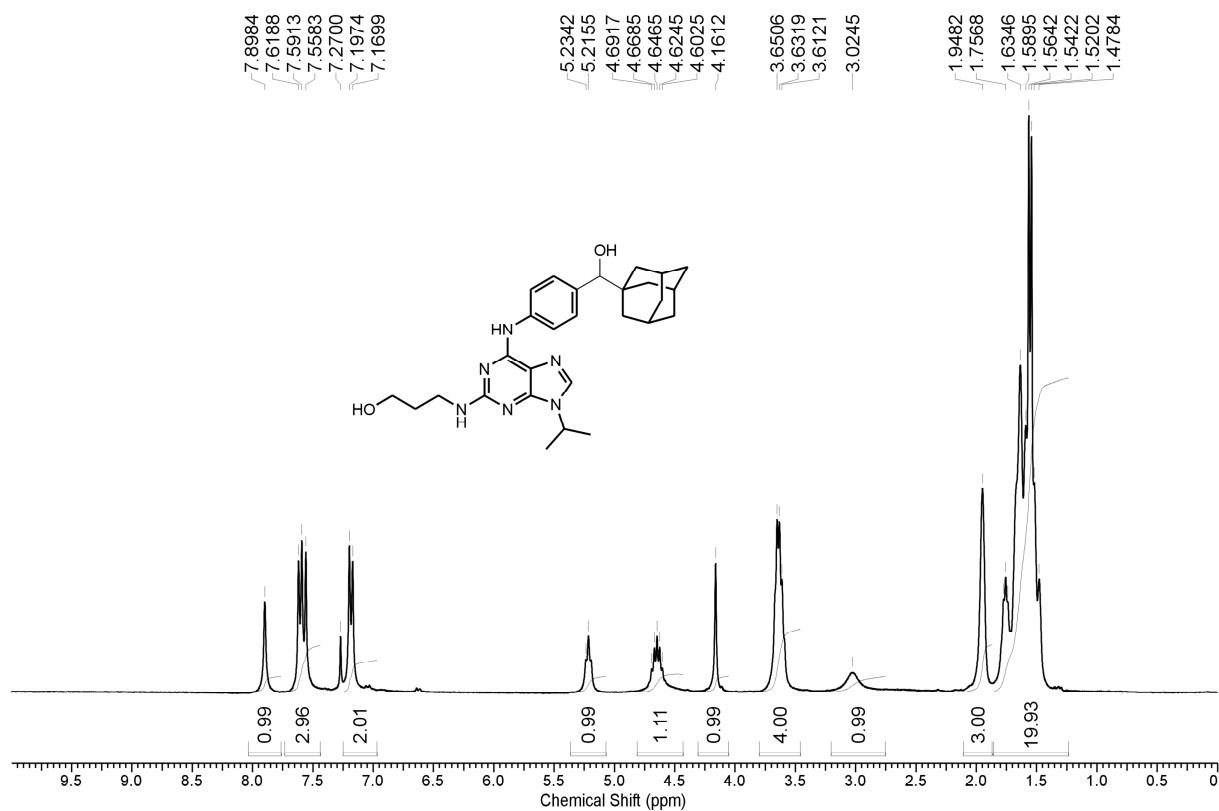

**Figure S13** <sup>1</sup>H NMR spectrum (CDCl<sub>3</sub>, 300 MHz, 303 K) of compound **4e**.

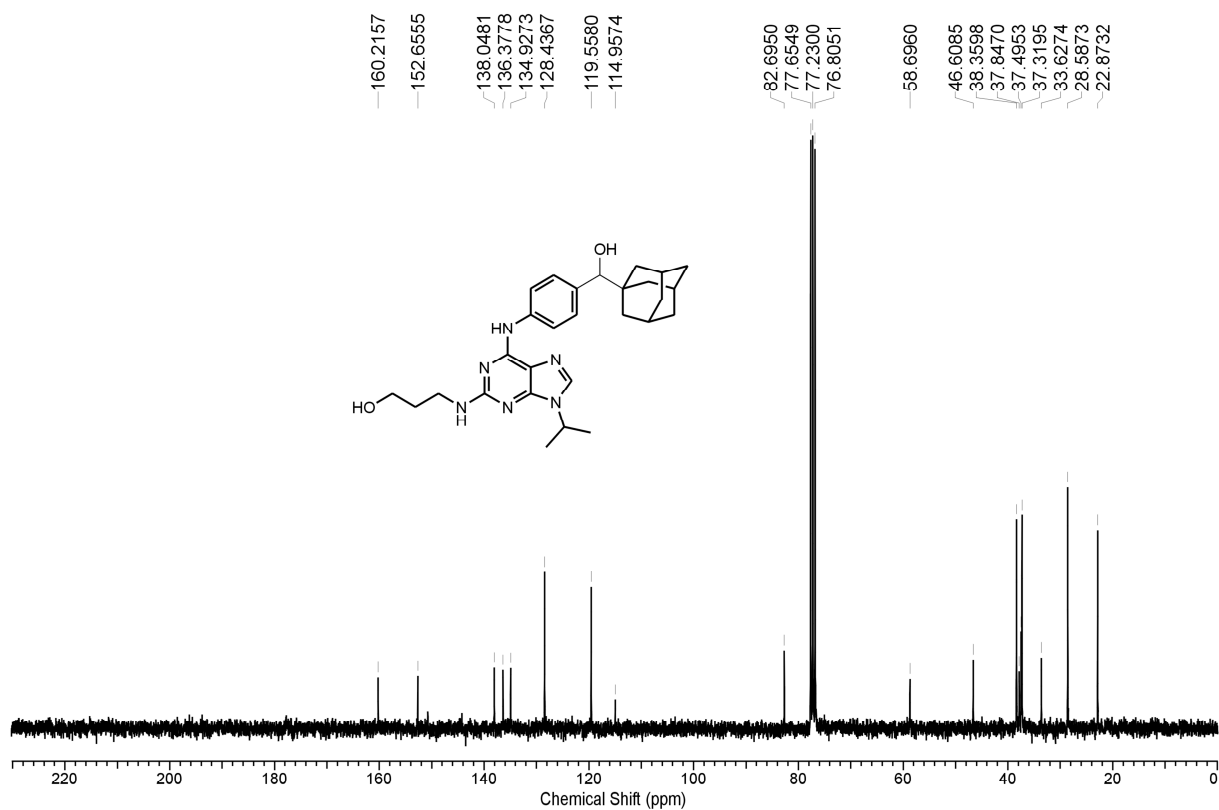

**Figure S14** <sup>13</sup>C NMR spectrum (CDCl<sub>3</sub>, 75 MHz, 303 K) of compound **4e**.

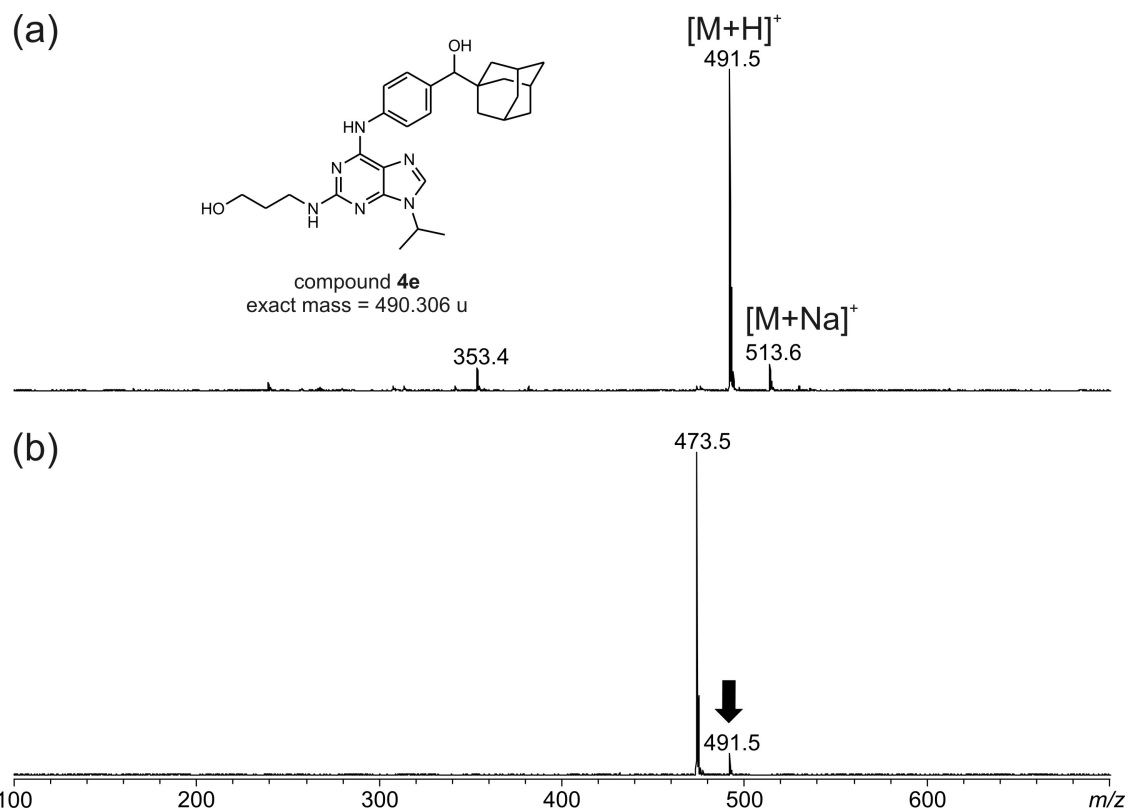

**Figure S15** Positive-ion mode ESI mass spectra (full scan) of compound **4e**; (a) first-order mass spectra, (b) MS/MS of  $m/z$  491. The assignments for the observed ions are shown in the brackets. The fragmented ion in tandem mass spectrum is marked with bold, downward arrow.

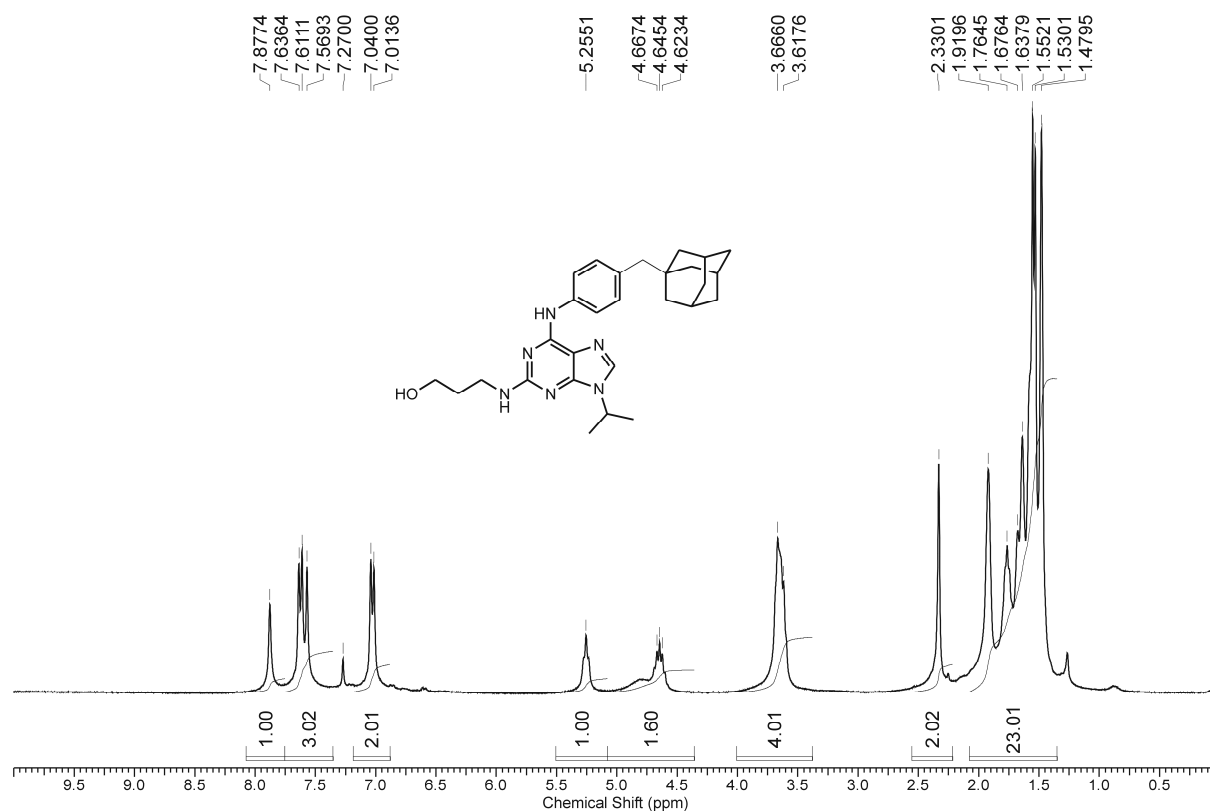

**Figure S16** <sup>1</sup>H NMR spectrum (CDCl<sub>3</sub>, 300 MHz, 303 K) of compound **4f**.

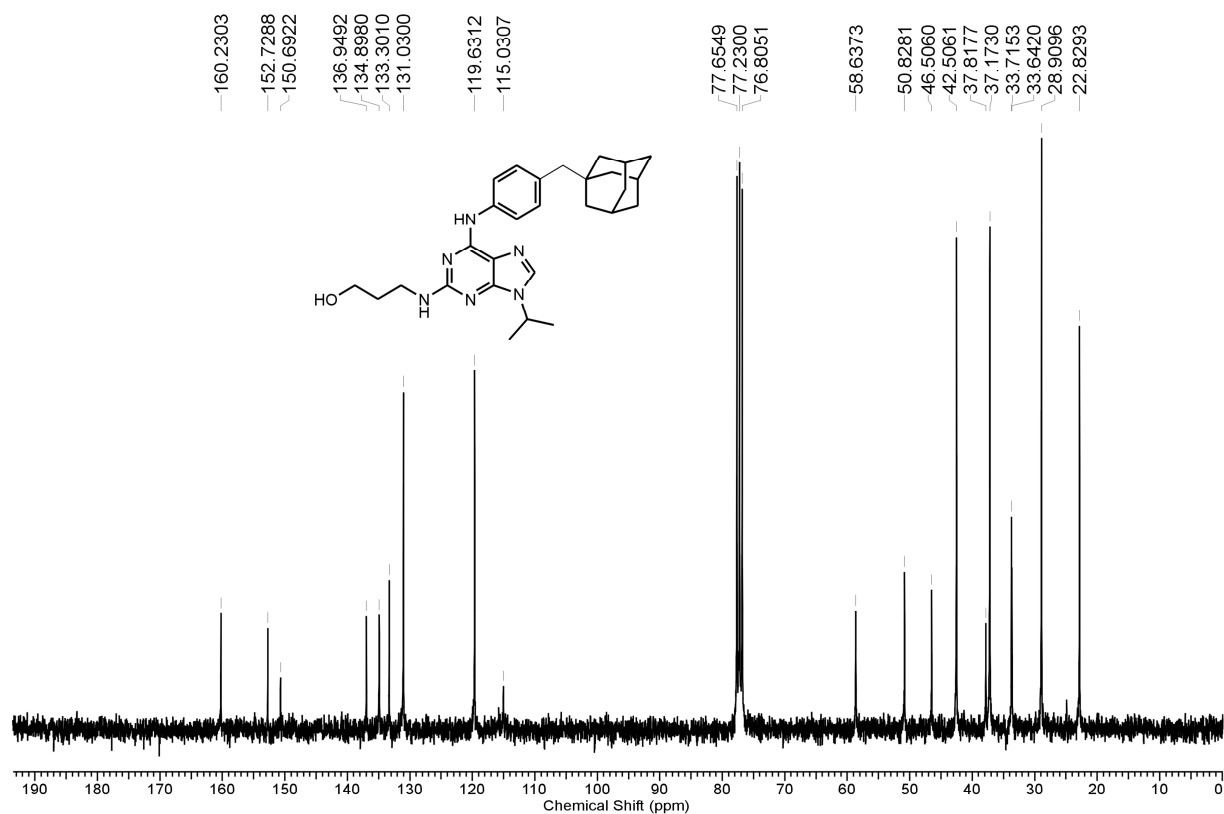

**Figure S17** <sup>13</sup>C NMR spectrum (CDCl<sub>3</sub>, 75 MHz, 303 K) of compound **4f**.



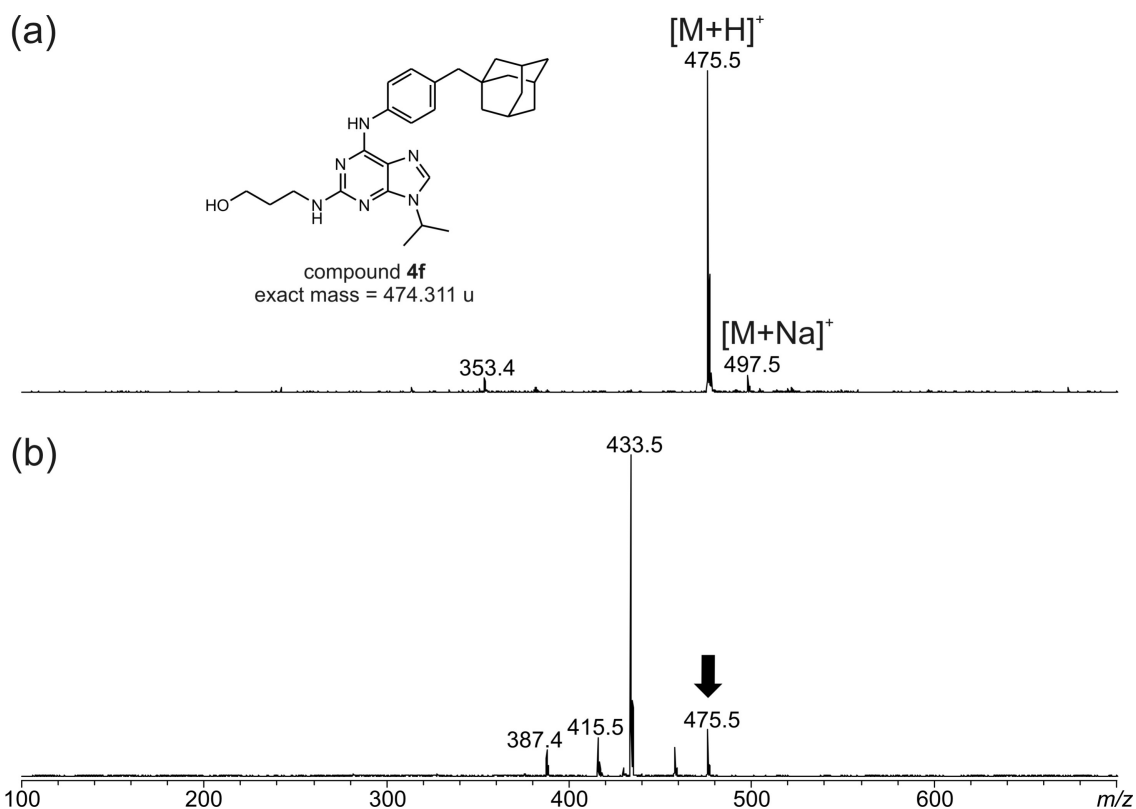

**Figure S18** Positive-ion mode ESI mass spectra (full scan) of compound **4f**; (a) first-order mass spectra, (b) MS/MS of  $m/z$  475. The assignments for the observed ions are shown in the brackets. The fragmented ion in tandem mass spectrum is marked with bold, downward arrow.

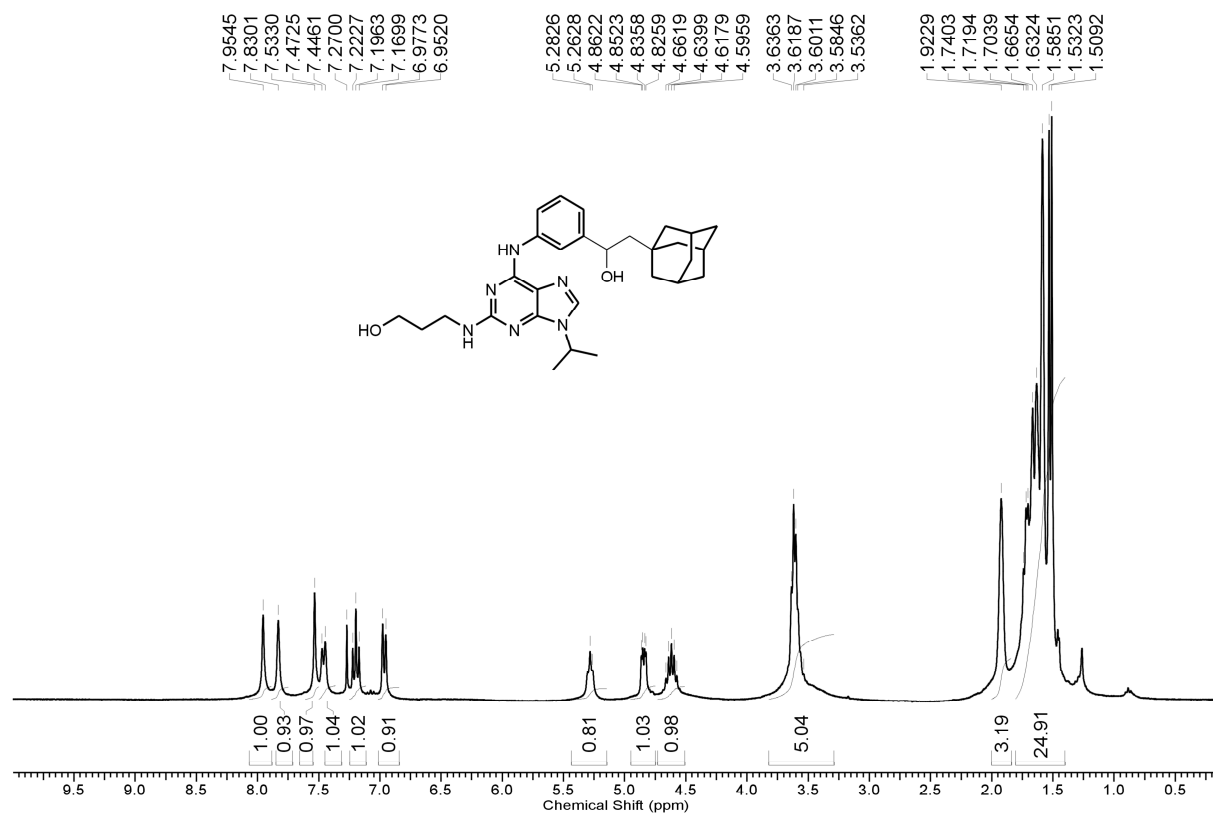

**Figure S19** <sup>1</sup>H NMR spectrum (CDCl<sub>3</sub>, 300 MHz, 303 K) of compound **4g**.

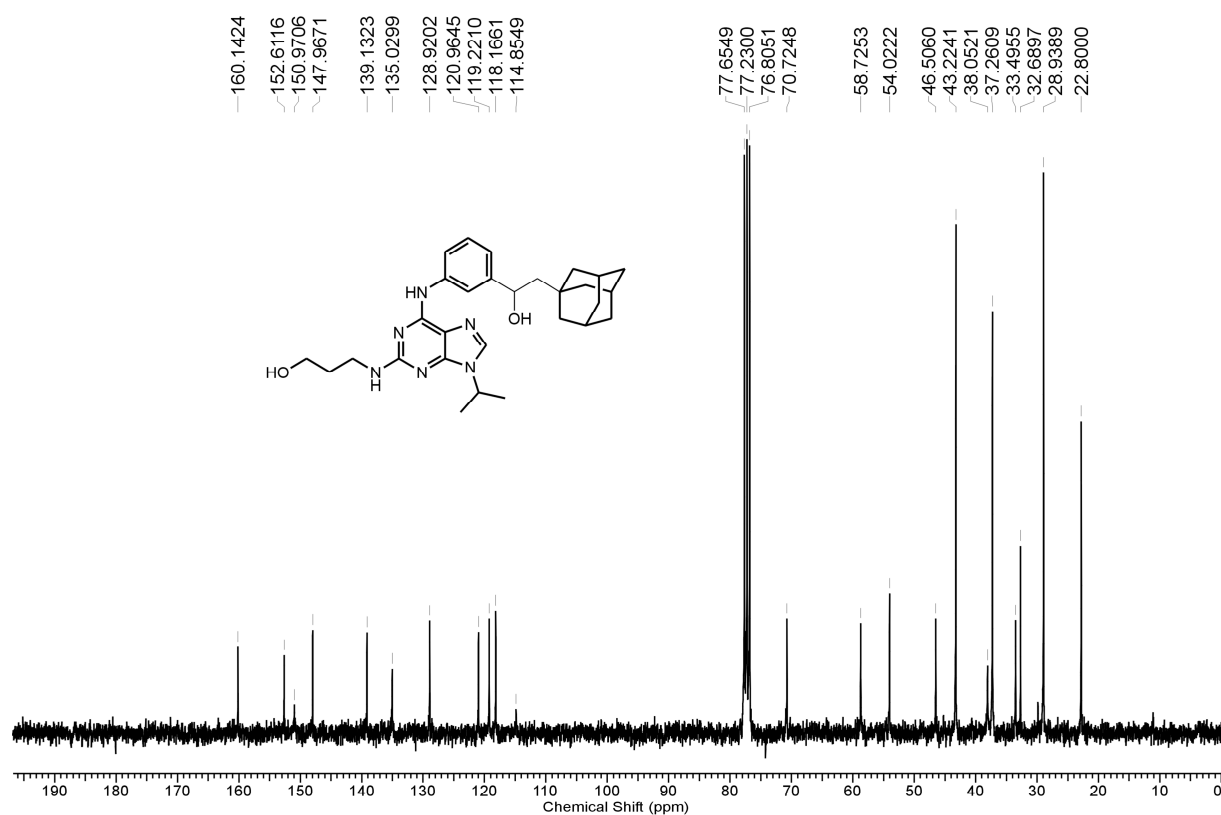

**Figure S20** <sup>13</sup>C NMR spectrum (CDCl<sub>3</sub>, 75 MHz, 303 K) of compound **4g**.

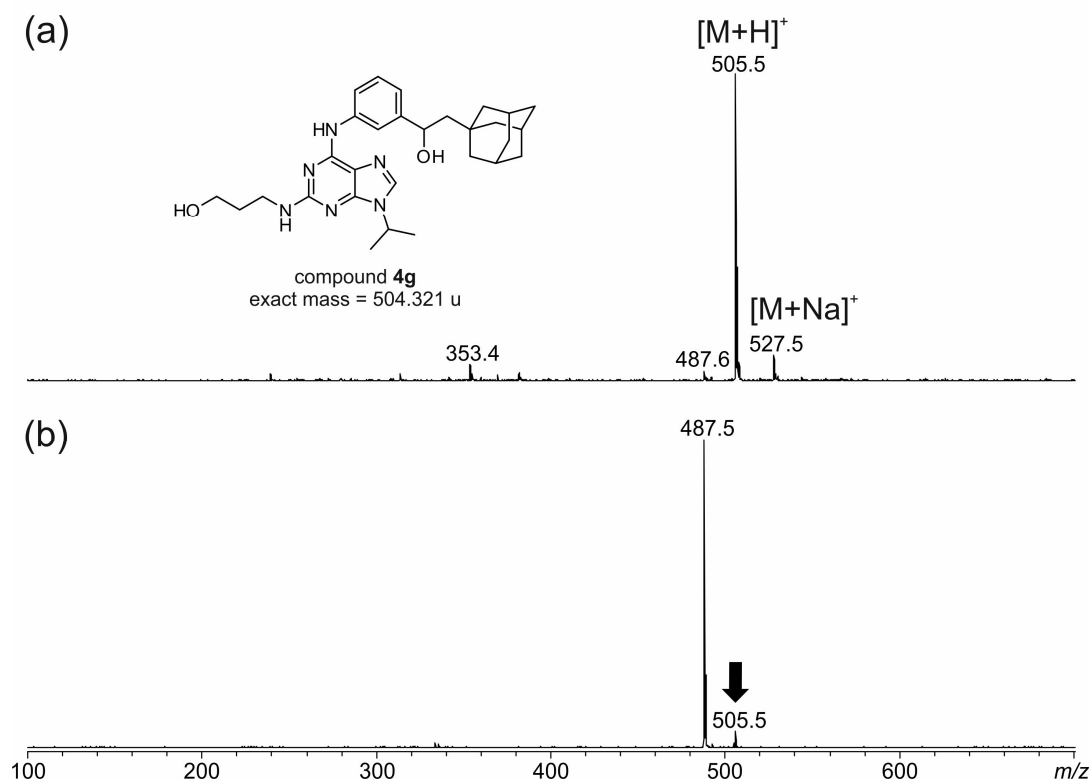

**Figure S21** Positive-ion mode ESI mass spectra (full scan) of compound **4g**; (a) first-order mass spectra, (b) MS/MS of  $m/z$  505. The assignments for the observed ions are shown in the brackets. The fragmented ion in tandem mass spectrum is marked with bold, downward arrow.

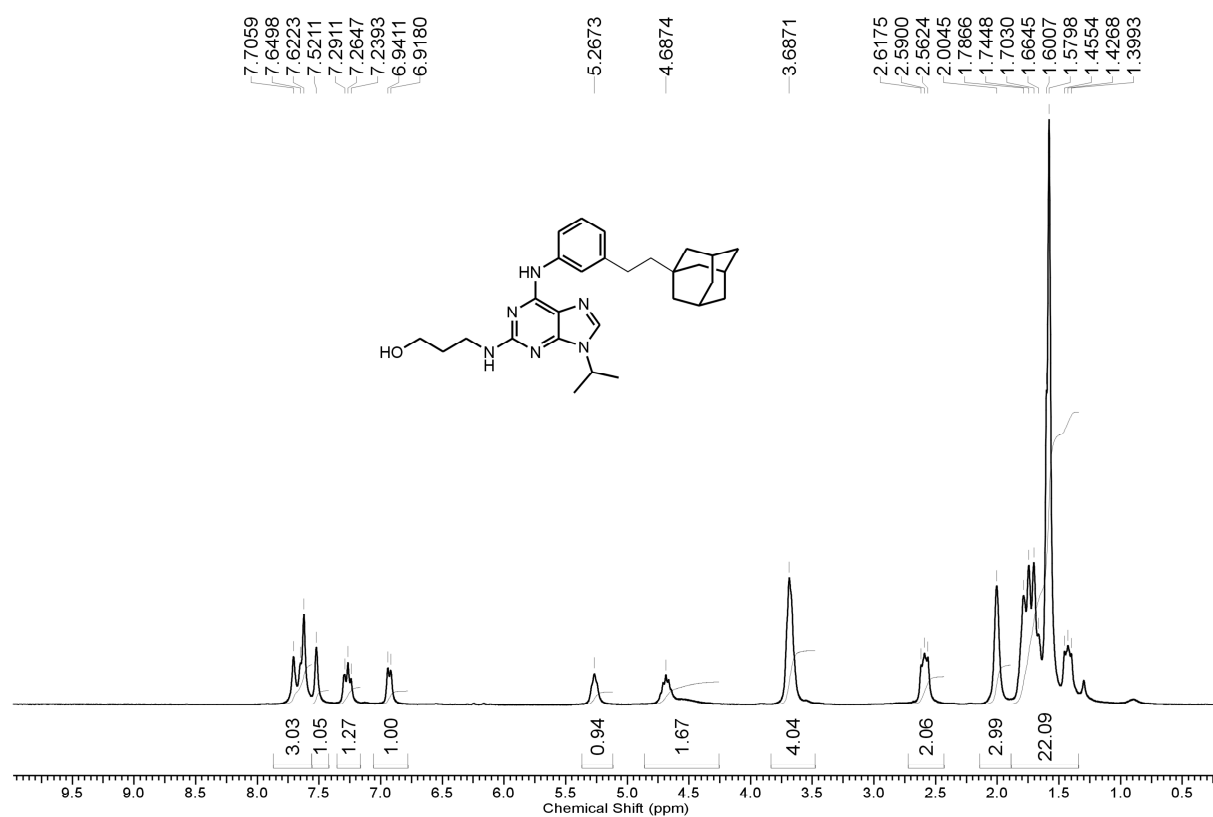

**Figure S22** <sup>1</sup>H NMR spectrum (CDCl<sub>3</sub>, 300 MHz, 303 K) of compound 4h.

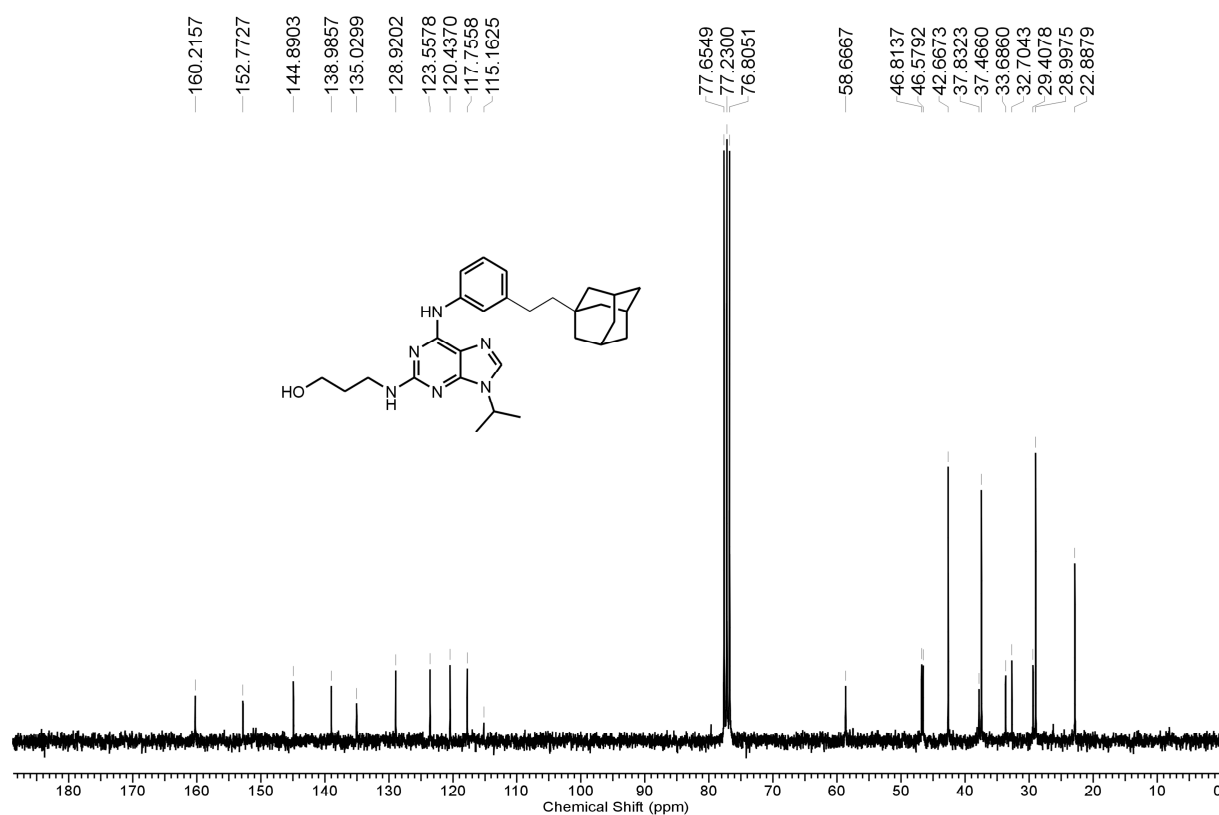

**Figure S23** <sup>13</sup>C NMR spectrum (CDCl<sub>3</sub>, 75 MHz, 303 K) of compound 4h.

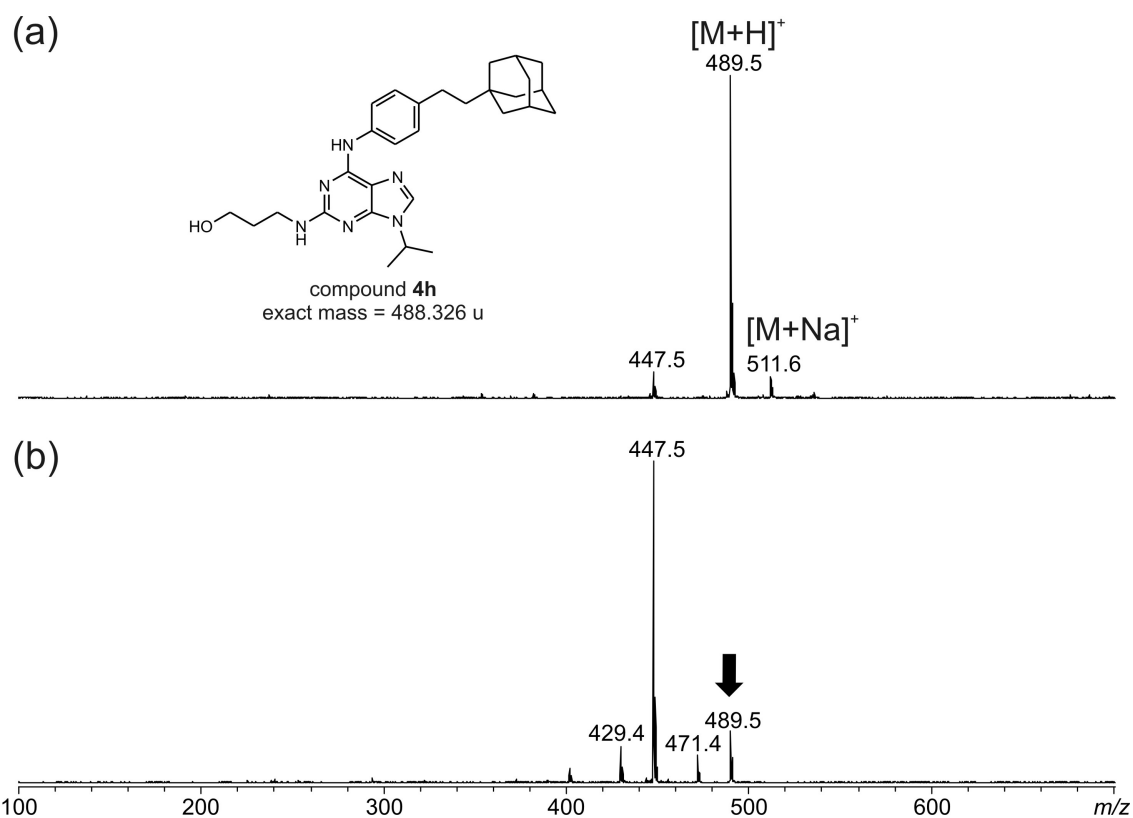

**Figure S24** Positive-ion mode ESI mass spectra (full scan) of compound **4h**; (a) first-order mass spectra, (b) MS/MS of  $m/z$  489. The assignments for the observed ions are shown in the brackets. The fragmented ion in tandem mass spectrum is marked with bold, downward arrow.

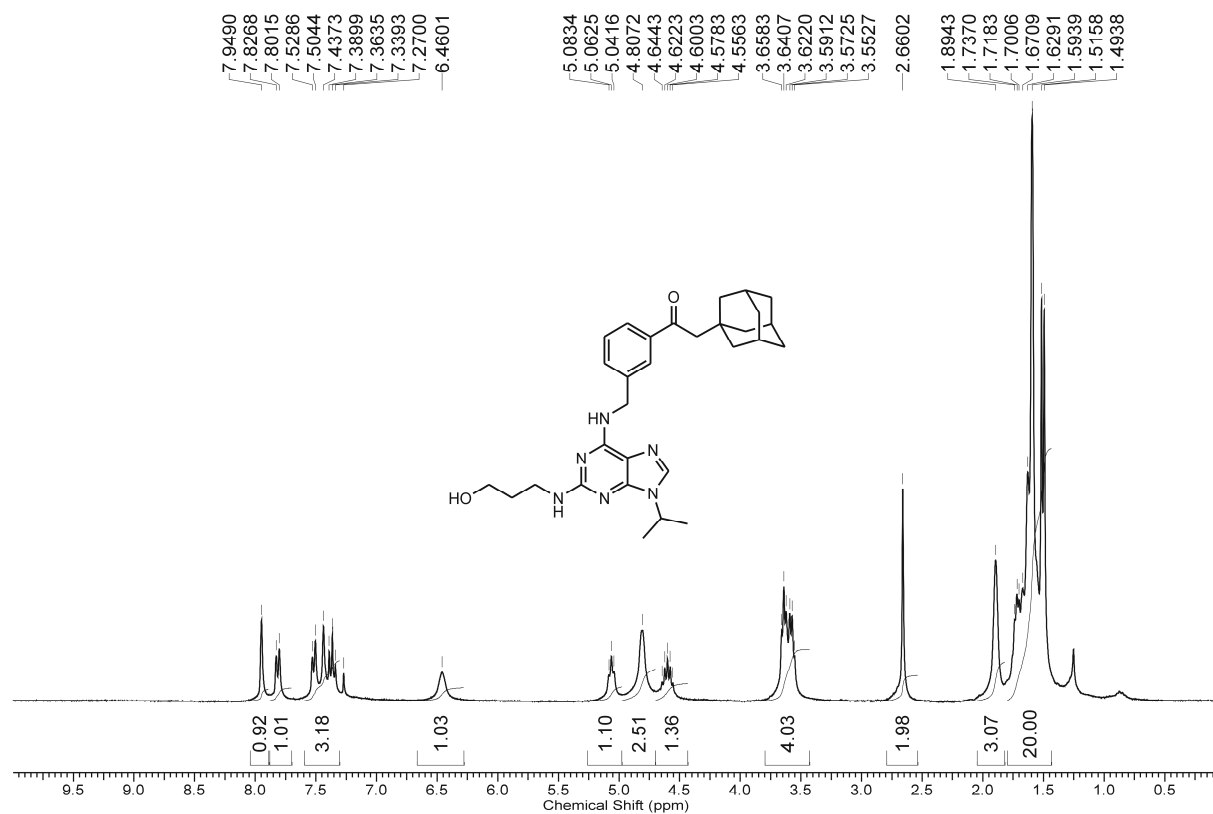

**Figure S25** <sup>1</sup>H NMR spectrum (CDCl<sub>3</sub>, 300 MHz, 303 K) of compound **4i**.

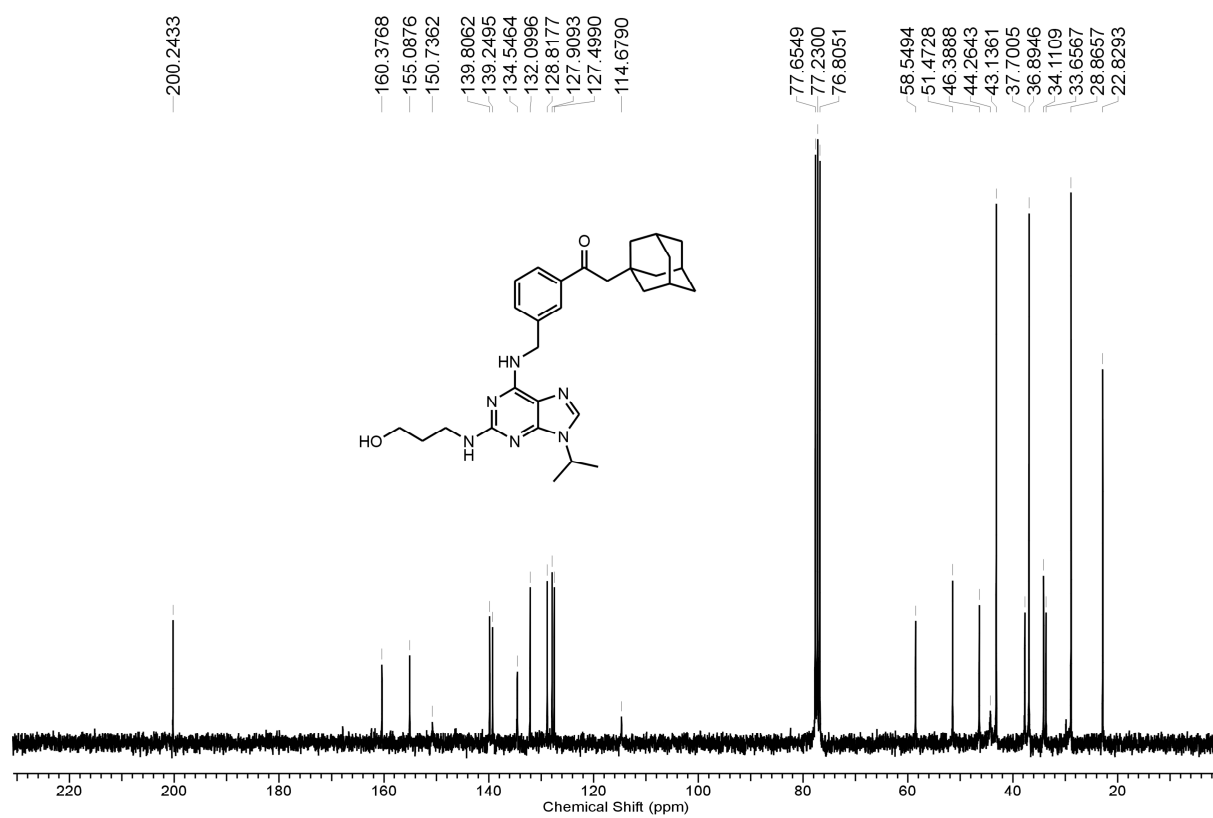

**Figure S26** <sup>13</sup>C NMR spectrum (CDCl<sub>3</sub>, 75 MHz, 303 K) of compound **4i**.

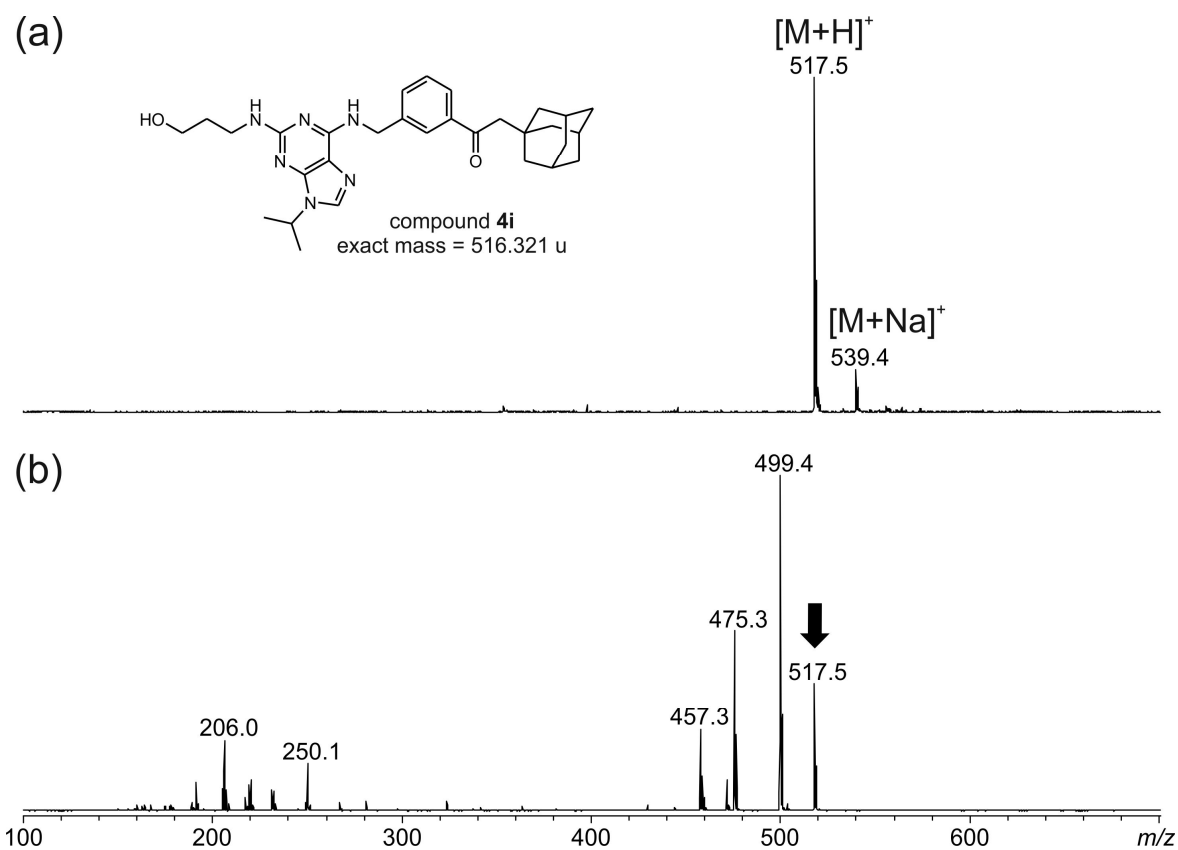

**Figure S27** Positive-ion mode ESI mass spectra (full scan) of compound **4i**; (a) first-order mass spectra, (b) MS/MS of  $m/z$  517. The assignments for the observed ions are shown in the brackets. The fragmented ion in tandem mass spectrum is marked with bold, downward arrow.

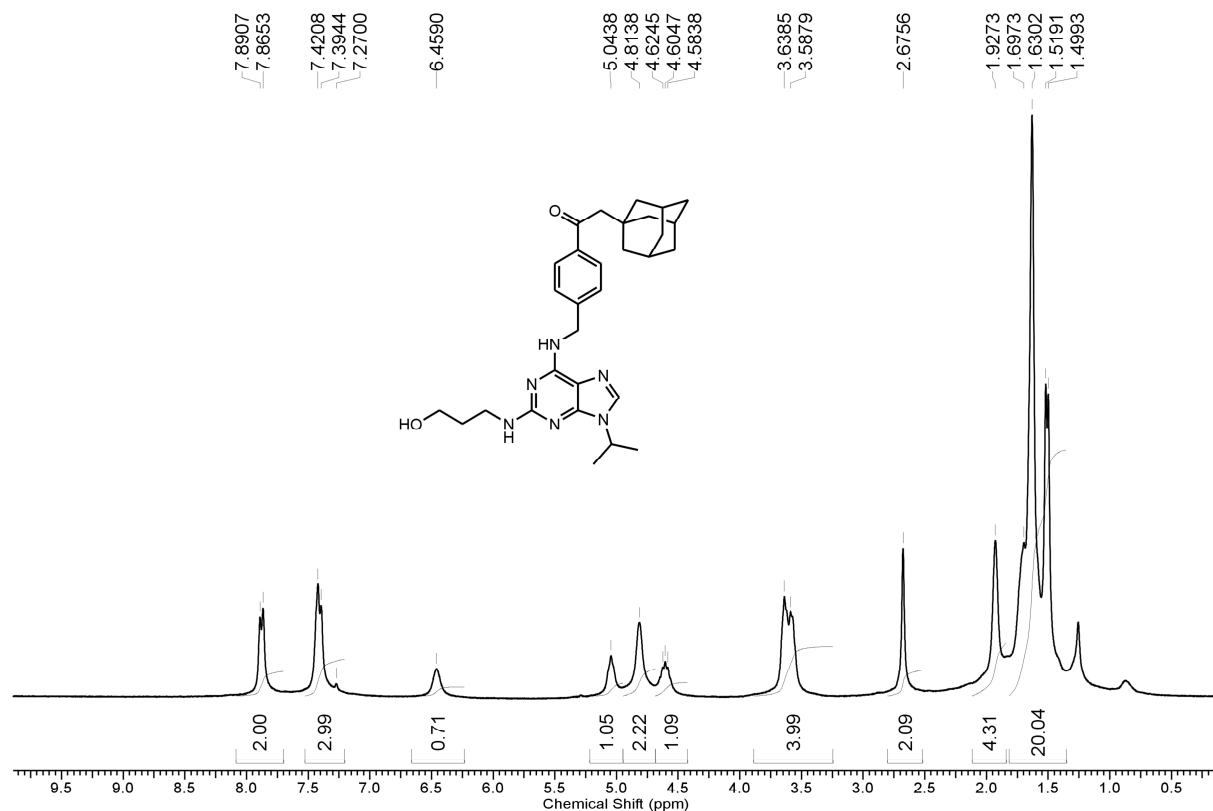

**Figure S28** <sup>1</sup>H NMR spectrum (CDCl<sub>3</sub>, 300 MHz, 303 K) of compound **4j**.

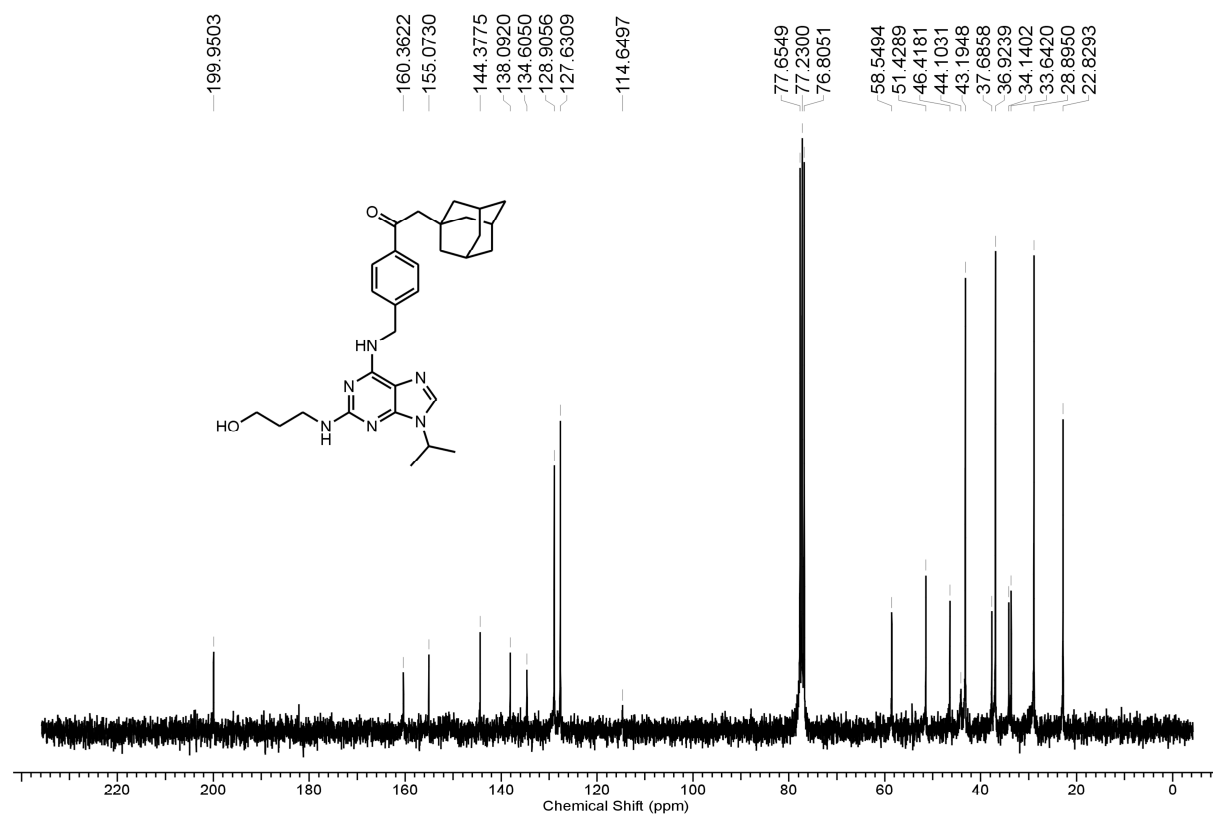

**Figure S29** <sup>13</sup>C NMR spectrum (CDCl<sub>3</sub>, 75 MHz, 303 K) of compound **4j**.



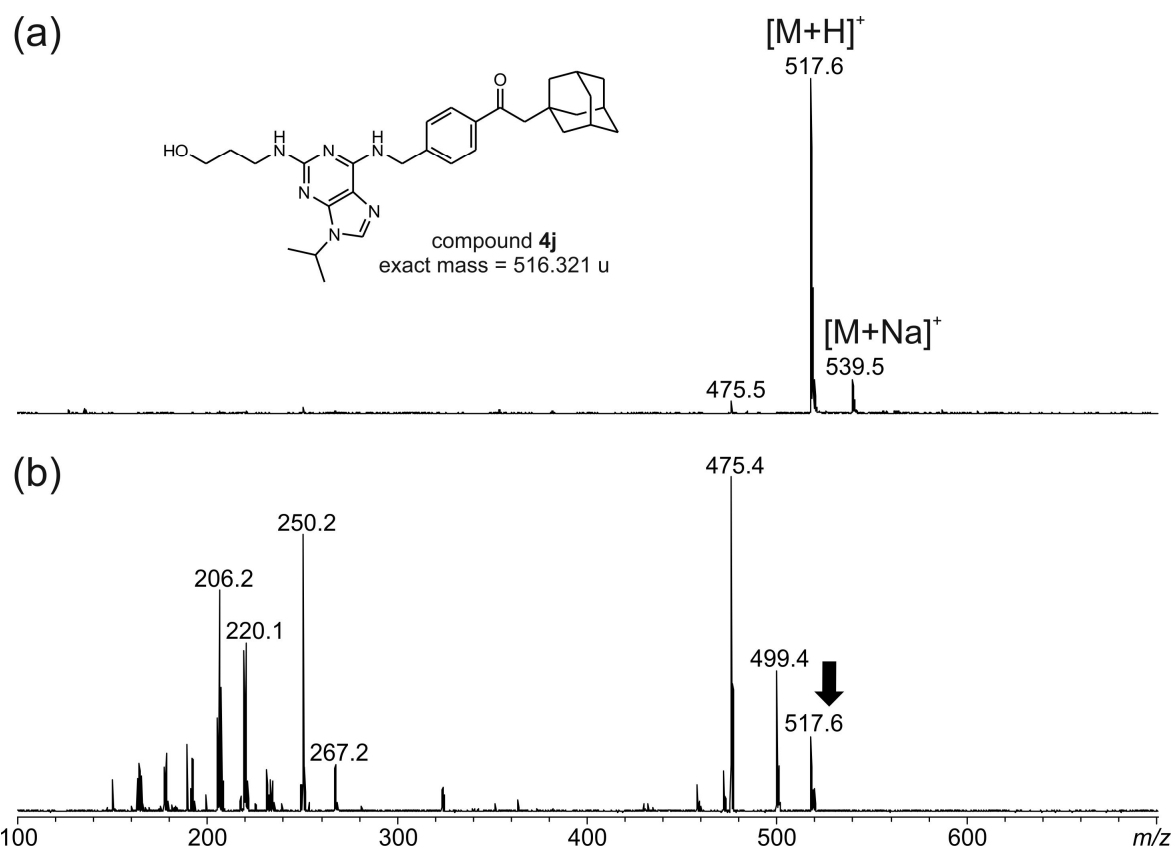

**Figure S30** Positive-ion mode ESI mass spectra (full scan) of compound **4j**; (a) first-order mass spectra, (b) MS/MS of *m/z* 517. The assignments for the observed ions are shown in the brackets. The fragmented ion in tandem mass spectrum is marked with bold, downward arrow.

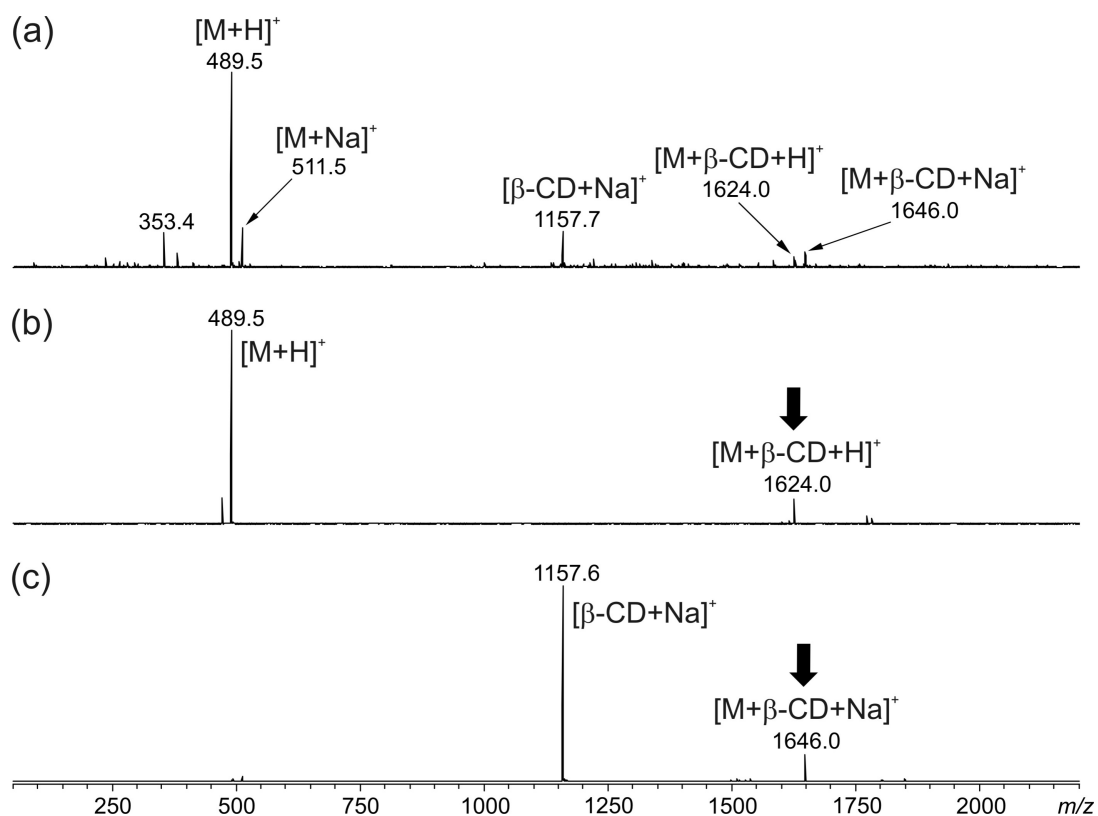

**Figure S31** The positive-ion ESI mass spectra of MeOH/H<sub>2</sub>O (1/1, v/v) solution of **4a**·β-CD; (a) first-order mass spectra, (b) MS/MS of *m/z* 1624, (c) MS/MS of *m/z* 1646. The assignments for the observed ions are shown in the brackets. The fragmented ions in tandem mass spectra are marked with bold, downward arrows.

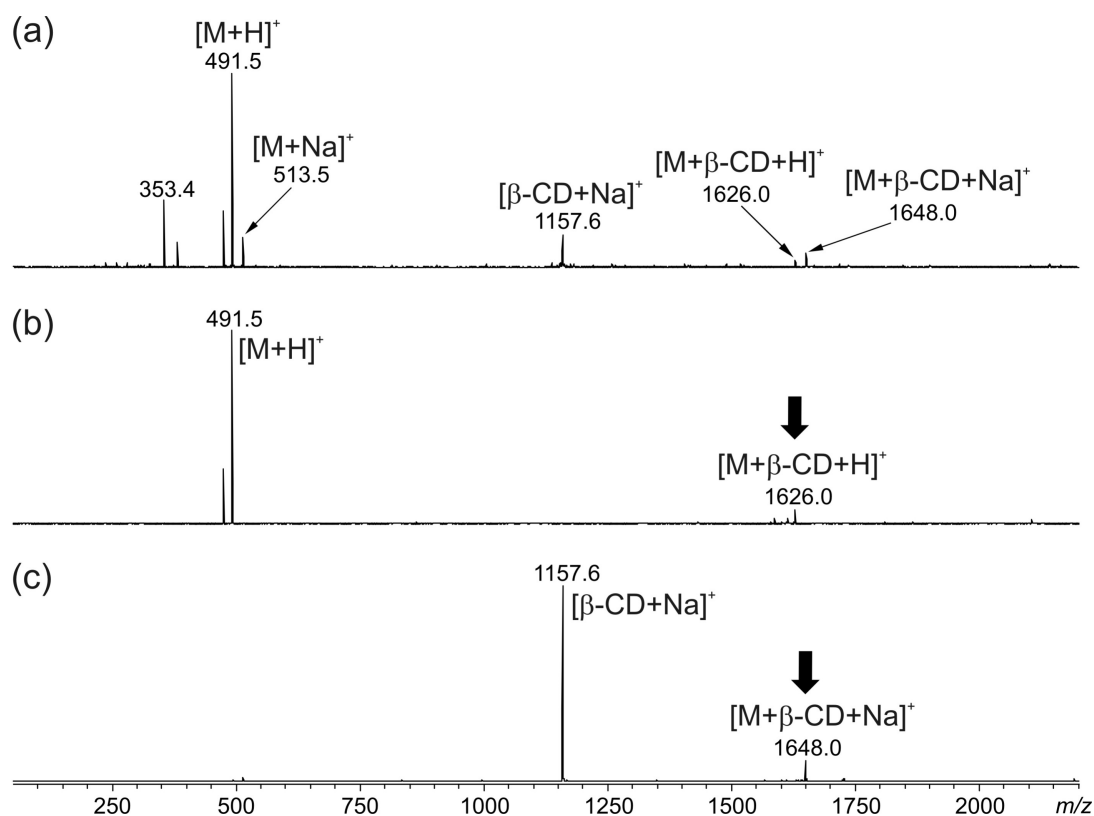

**Figure S32** The positive-ion ESI mass spectra of MeOH/H<sub>2</sub>O (1/1, v/v) solution of **4b**·β-CD; (a) first-order mass spectra, (b) MS/MS of *m/z* 1626, (c) MS/MS of *m/z* 1648. The assignments for the observed ions are shown in the brackets. The fragmented ions in tandem mass spectra are marked with bold, downward arrows.

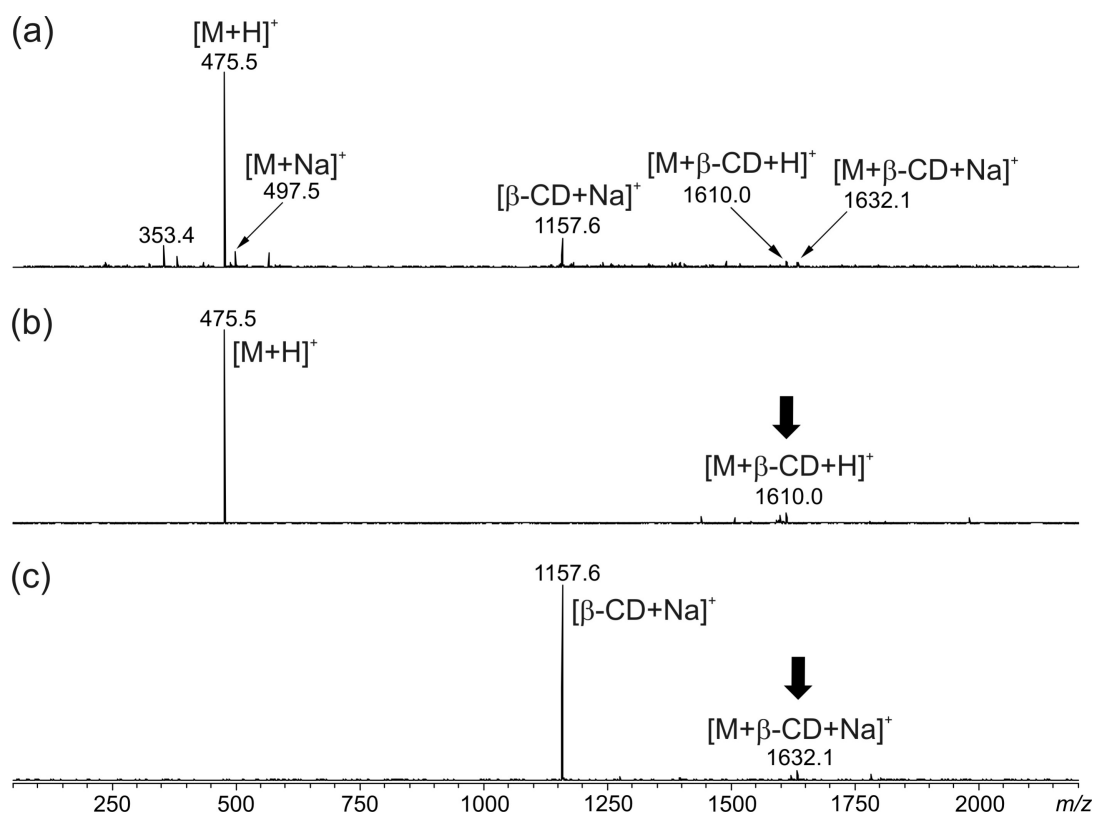

**Figure S33** The positive-ion ESI mass spectra of MeOH/H<sub>2</sub>O (1/1, v/v) solution of **4c**·β-CD; (a) first-order mass spectra, (b) MS/MS of *m/z* 1610, (c) MS/MS of *m/z* 1632. The assignments for the observed ions are shown in the brackets. The fragmented ions in tandem mass spectra are marked with bold, downward arrows.

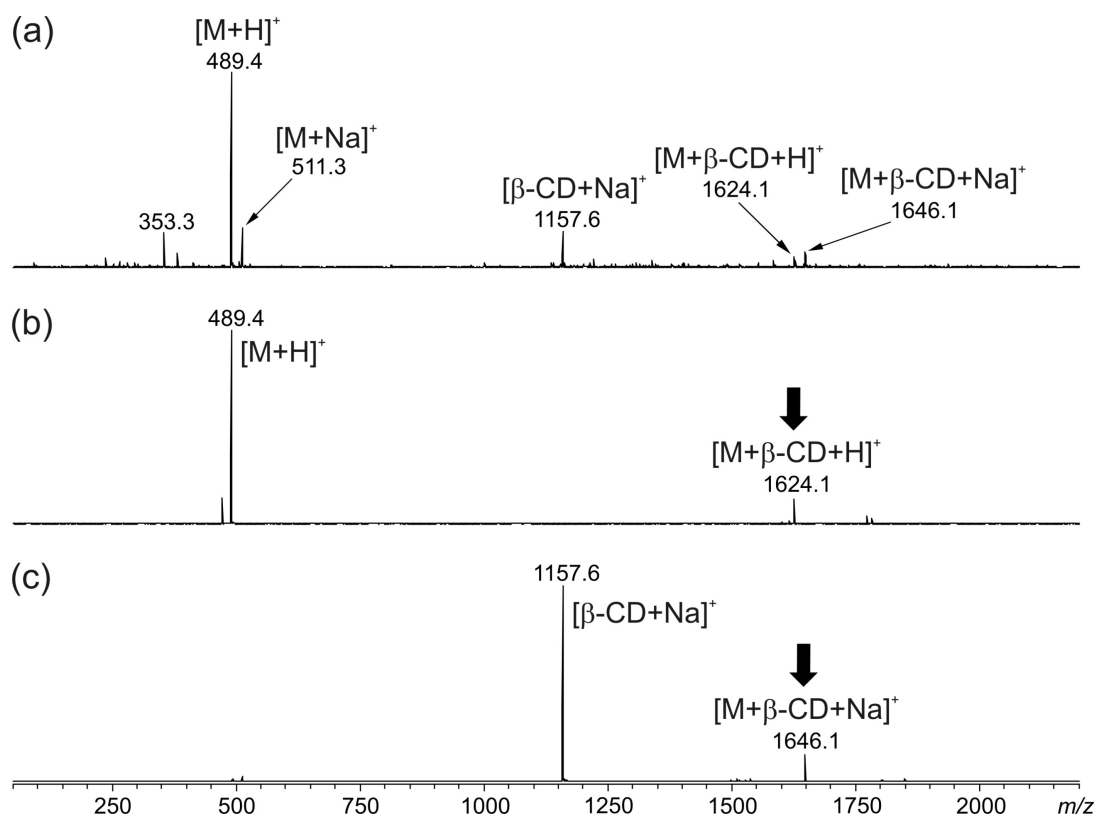

**Figure S34** The positive-ion ESI mass spectra of MeOH/H<sub>2</sub>O (1/1, v/v) solution of **4d**·β-CD; (a) first-order mass spectra, (b) MS/MS of *m/z* 1624, (c) MS/MS of *m/z* 1646. The assignments for the observed ions are shown in the brackets. The fragmented ions in tandem mass spectra are marked with bold, downward arrows.

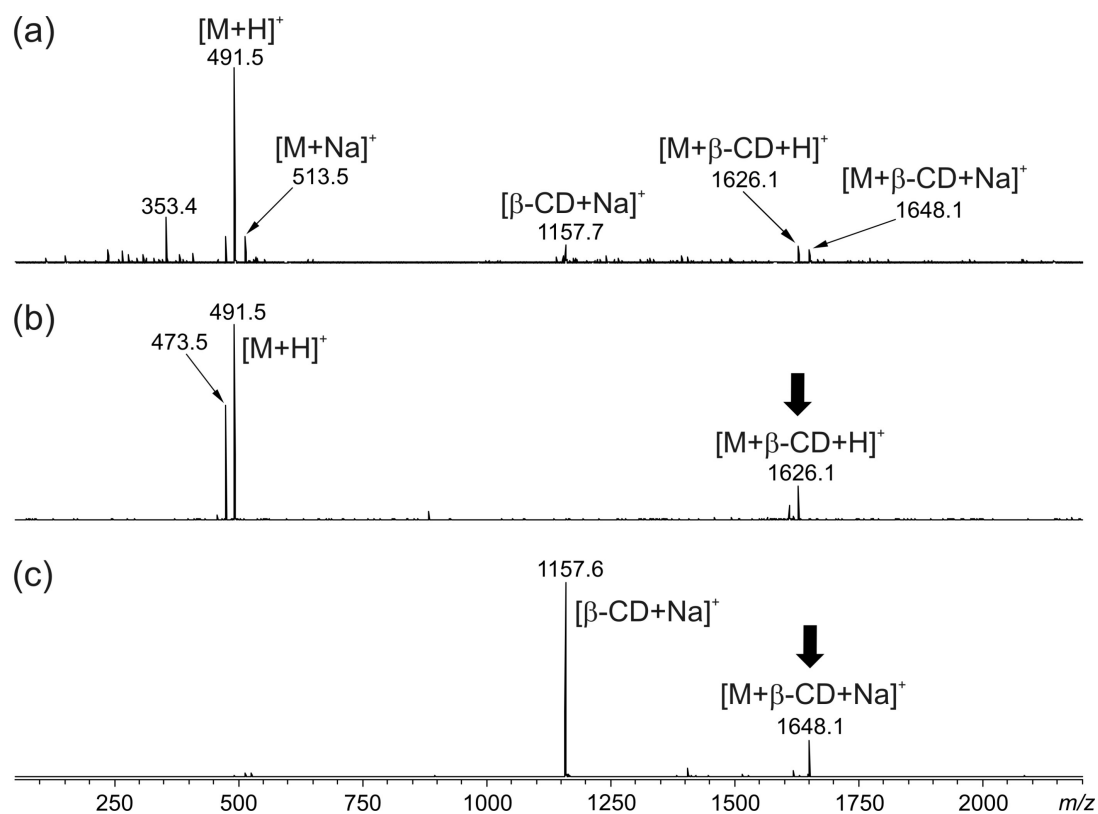

**Figure S35** The positive-ion ESI mass spectra of MeOH/H<sub>2</sub>O (1/1, v/v) solution of **4e**·β-CD; (a) first-order mass spectra, (b) MS/MS of *m/z* 1626, (c) MS/MS of *m/z* 1648. The assignments for the observed ions are shown in the brackets. The fragmented ions in tandem mass spectra are marked with bold, downward arrows.

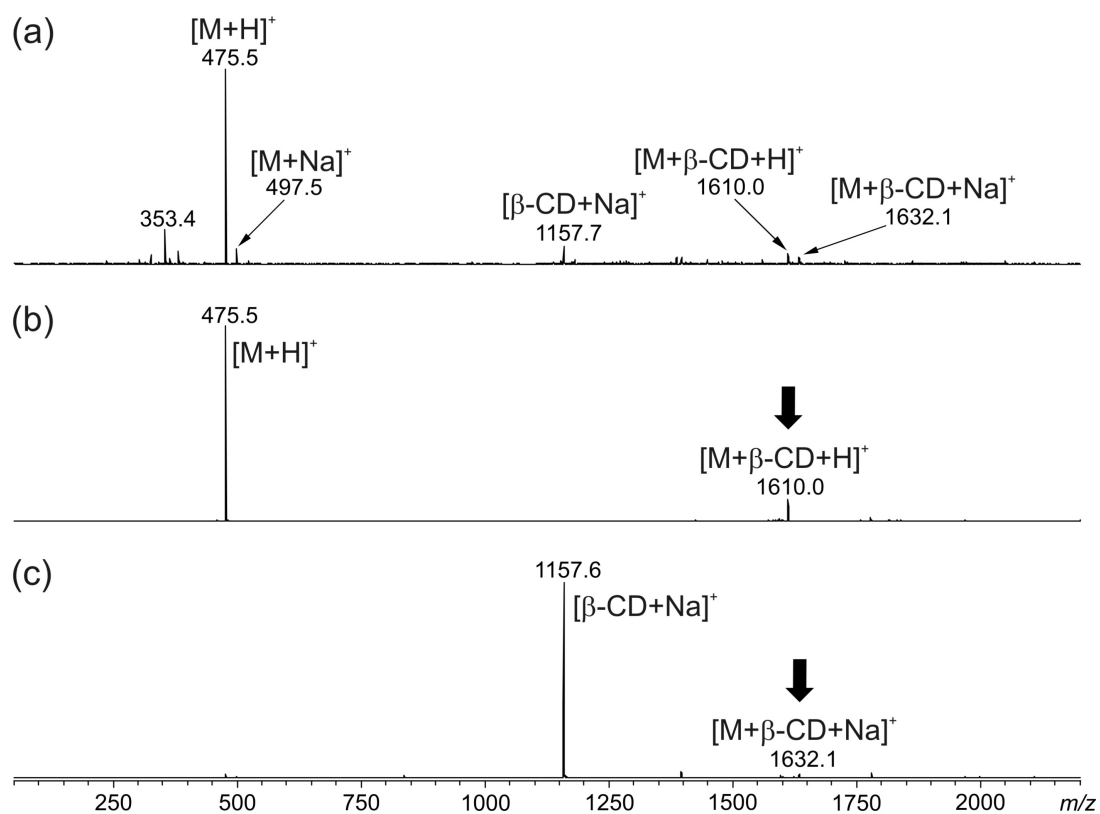

**Figure S36** The positive-ion ESI mass spectra of MeOH/H<sub>2</sub>O (1/1, v/v) solution of **4f**· $\beta$ -CD; (a) first-order mass spectra, (b) MS/MS of  $m/z$  1610, (c) MS/MS of  $m/z$  1632. The assignments for the observed ions are shown in the brackets. The fragmented ions in tandem mass spectra are marked with bold, downward arrows.

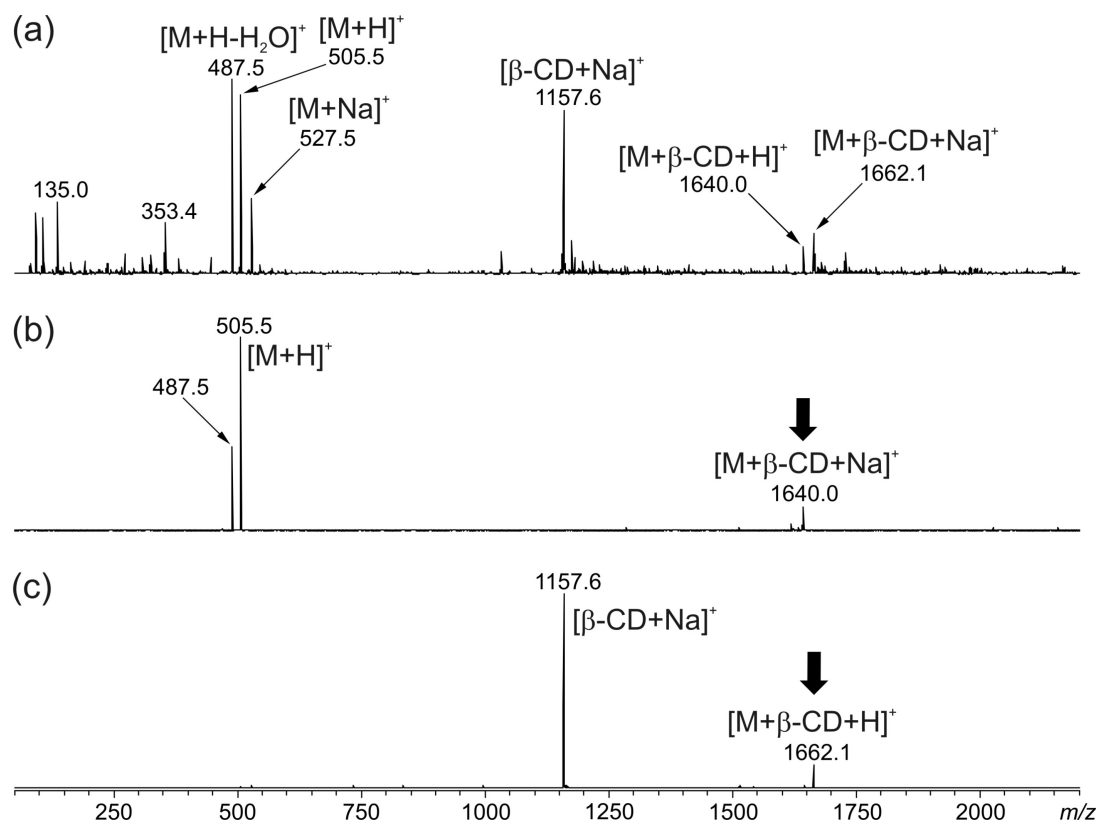

**Figure S37** The positive-ion ESI mass spectra of MeOH/H<sub>2</sub>O (1/1, v/v) solution of **4g**·β-CD; (a) first-order mass spectra, (b) MS/MS of *m/z* 1640, (c) MS/MS of *m/z* 1662. The assignments for the observed ions are shown in the brackets. The fragmented ions in tandem mass spectra are marked with bold, downward arrows.



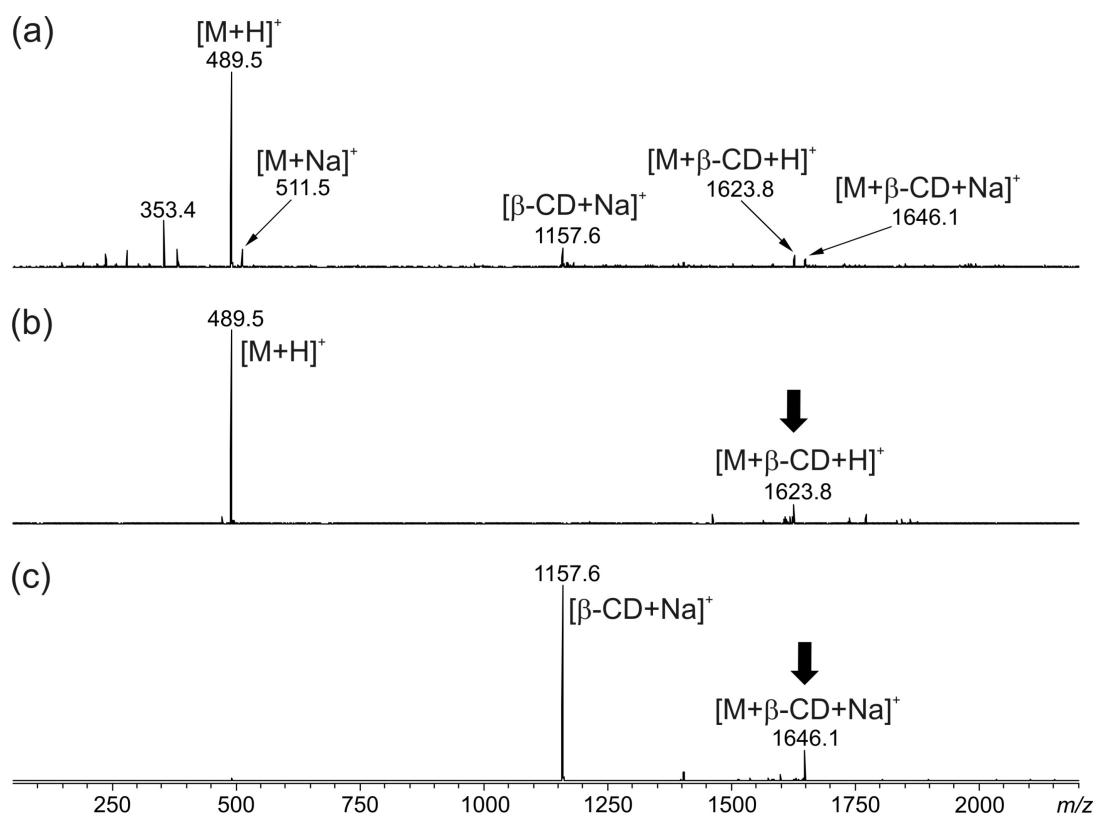

**Figure S38** The positive-ion ESI mass spectra of MeOH/H<sub>2</sub>O (1/1, v/v) solution of 4h·β-CD; (a) first-order mass spectra, (b) MS/MS of *m/z* 1623, (c) MS/MS of *m/z* 1646. The assignments for the observed ions are shown in the brackets. The fragmented ions in tandem mass spectra are marked with bold, downward arrows.

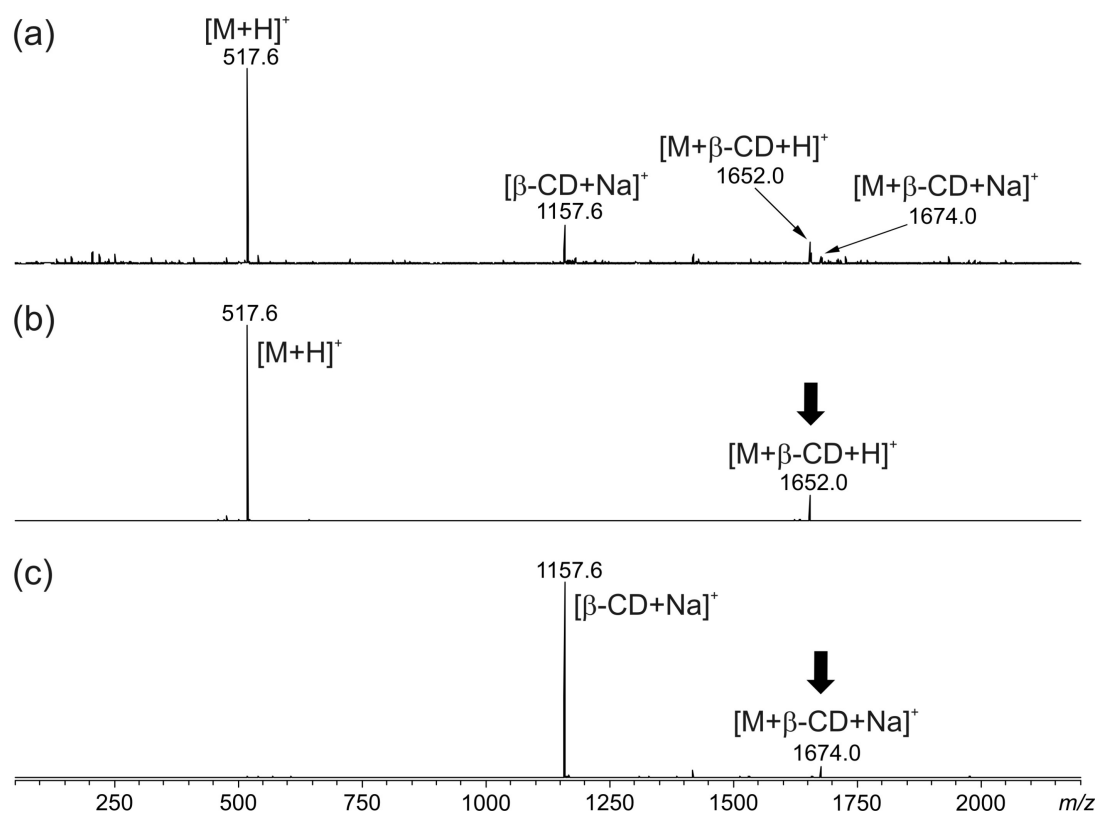

**Figure S39** The positive-ion ESI mass spectra of MeOH/H<sub>2</sub>O (1/1, v/v) solution of **4j**·β-CD; (a) first-order mass spectra, (b) MS/MS of *m/z* 1652, (c) MS/MS of *m/z* 1674. The assignments for the observed ions are shown in the brackets. The fragmented ions in tandem mass spectra are marked with bold, downward arrows.

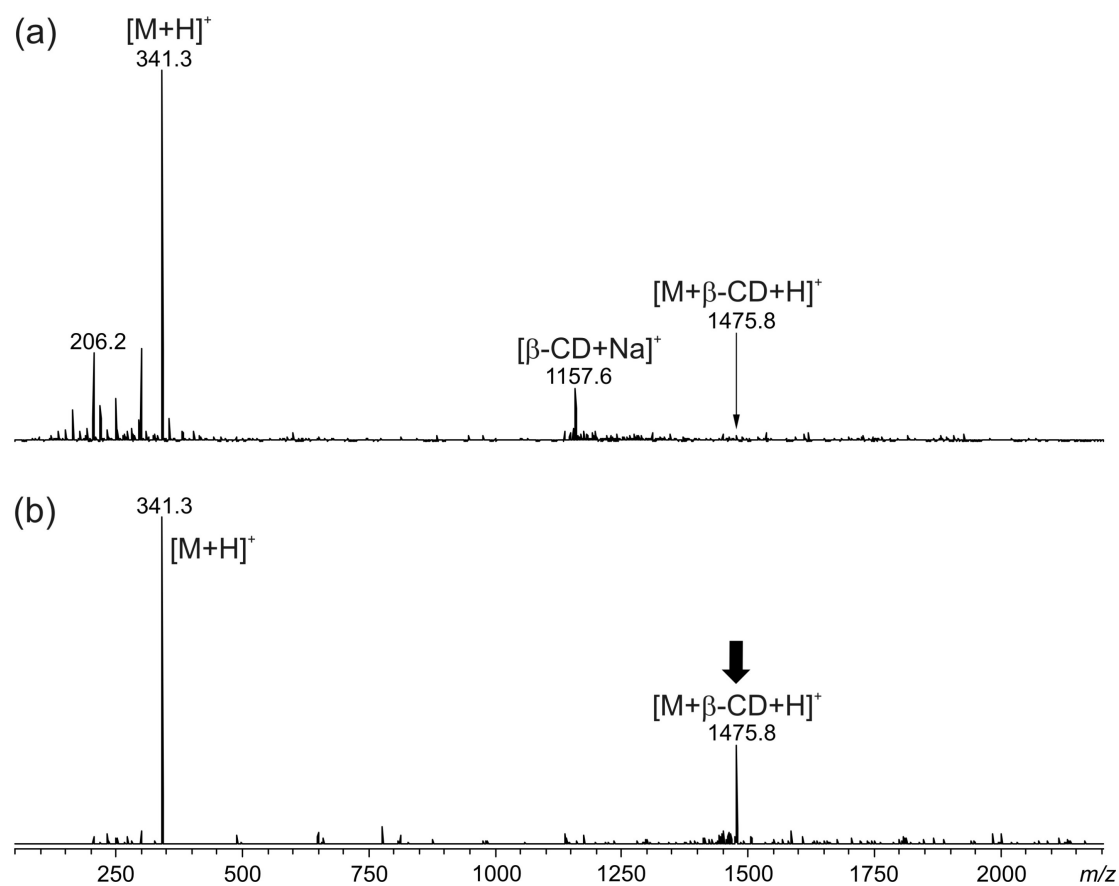

**Figure S40** The positive-ion ESI mass spectra of MeOH/H<sub>2</sub>O (1/1, v/v) solution of **4k**· $\beta$ -CD; (a) first-order mass spectra, (b) MS/MS of  $m/z$  1475. The assignments for the observed ions are shown in the brackets. The fragmented ion in tandem mass spectra is marked with bold, downward arrow.

## Molecular docking results

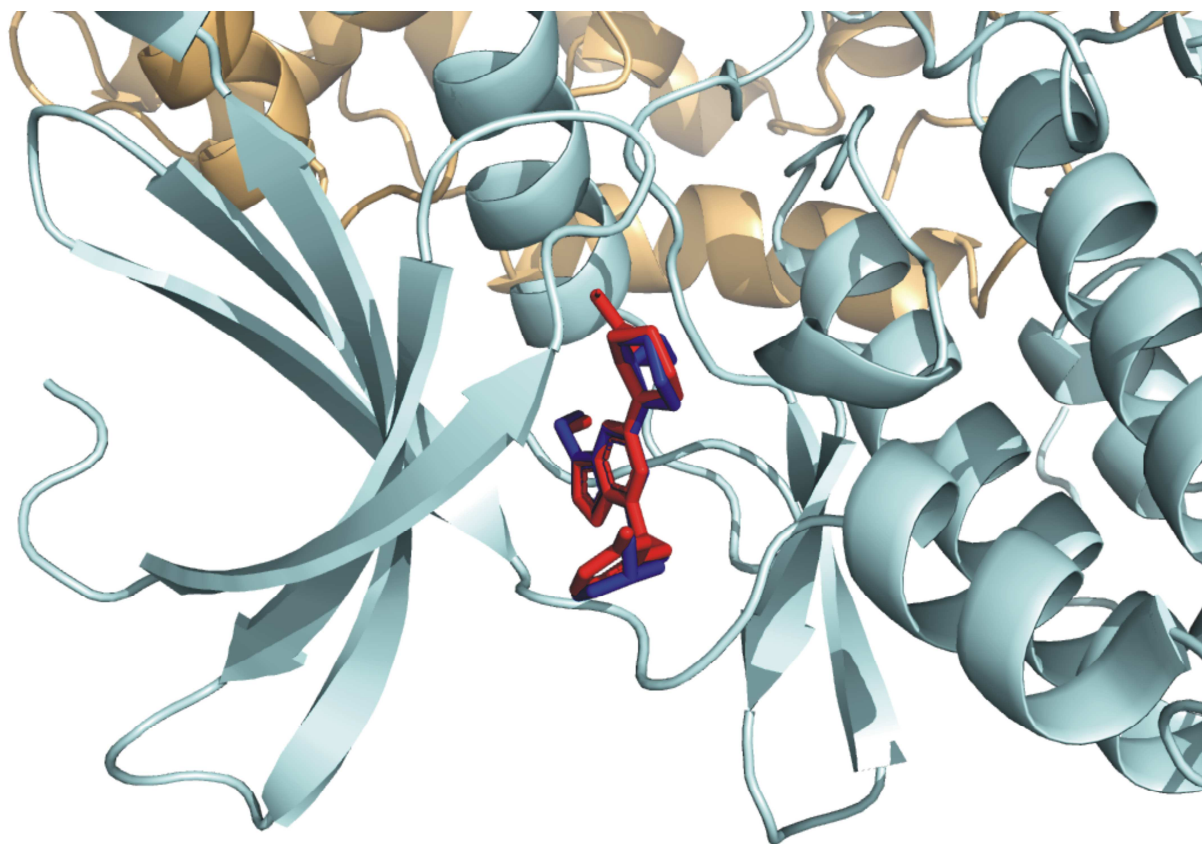

**Figure S41** The dinaciclib molecule redocked (red) into X-ray diffraction structure of CDK2 (light blue)/cyclin E (light yellow) complex with dinaciclib (blue).

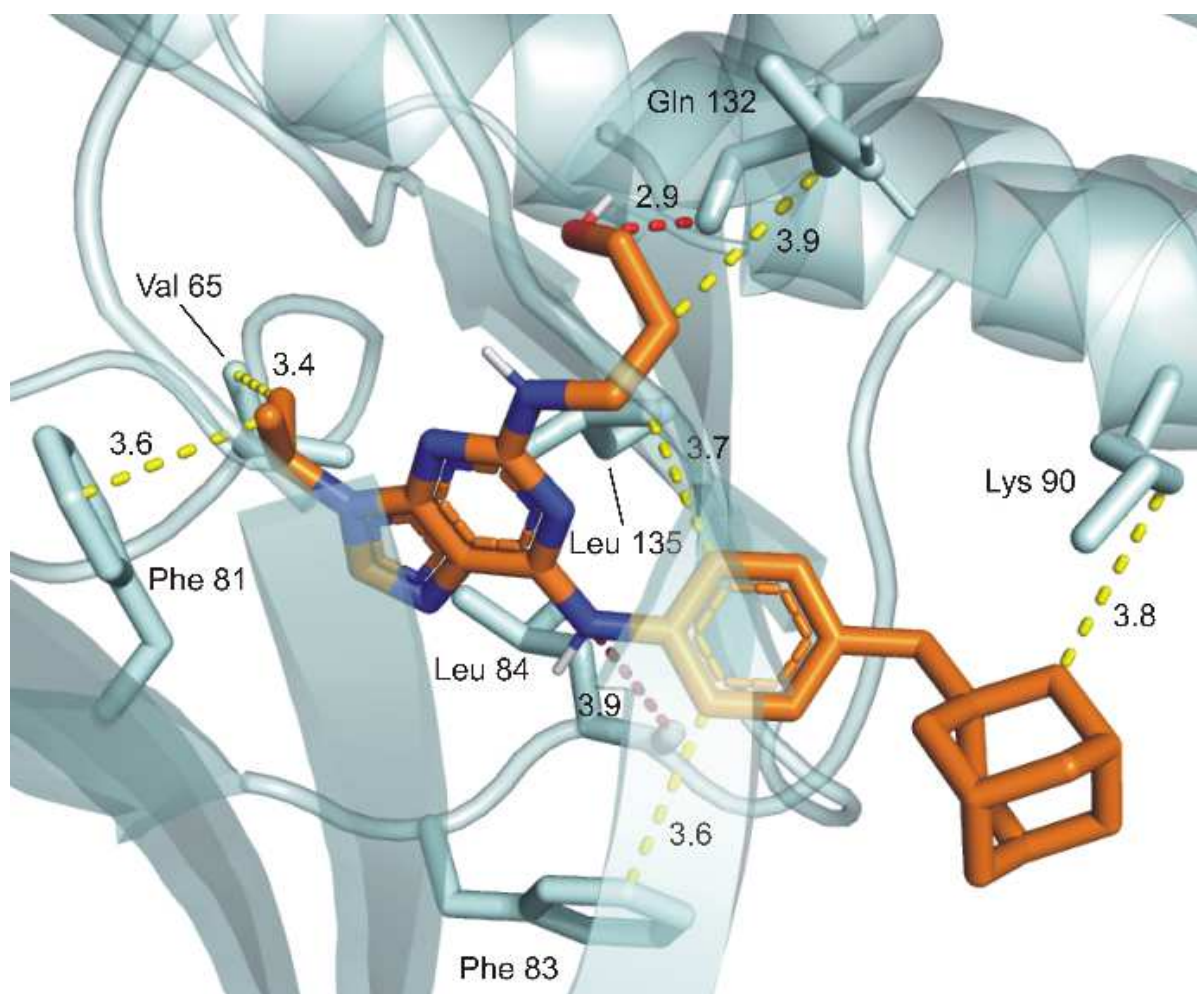

**Figure S42** Purine **4f** docked into CDK2/cyclin E active site. Intermolecular contacts were analysed using PLIP. Non-polar contacts and H-bonds are shown as yellow and red dashed lines, respectively. Lengths are given in Å.

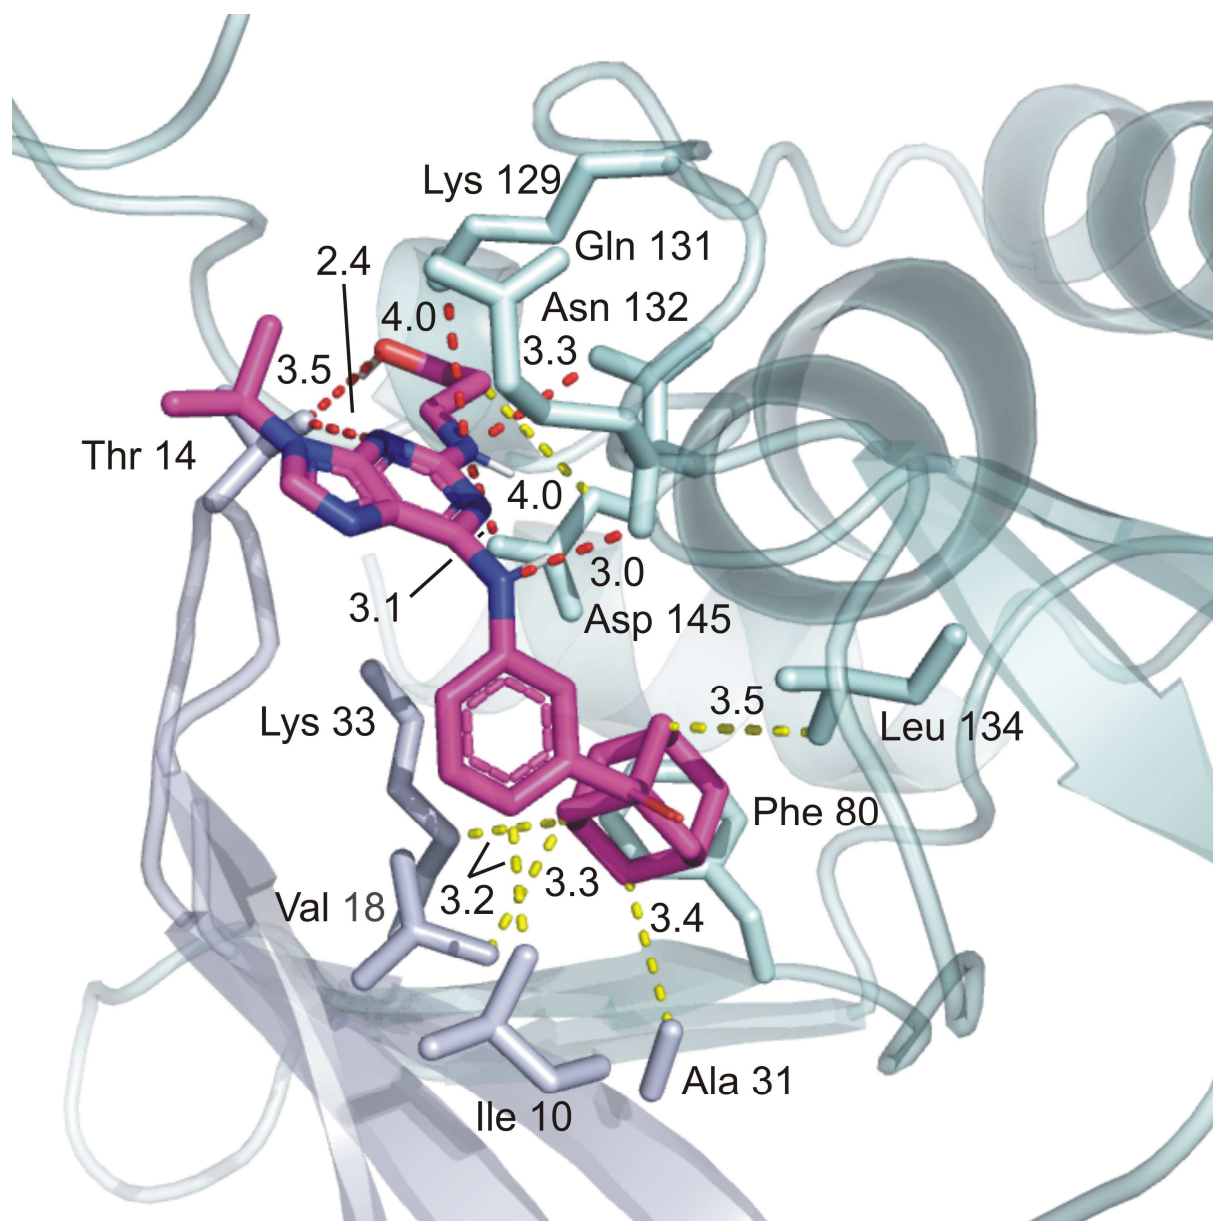

**Figure S43** Purine **4a** docked into CDK2 active site. Intermolecular contacts were analysed using PLIP. Non-polar contacts and H-bonds are shown as yellow and red dashed lines, respectively. Lengths are given in Å.

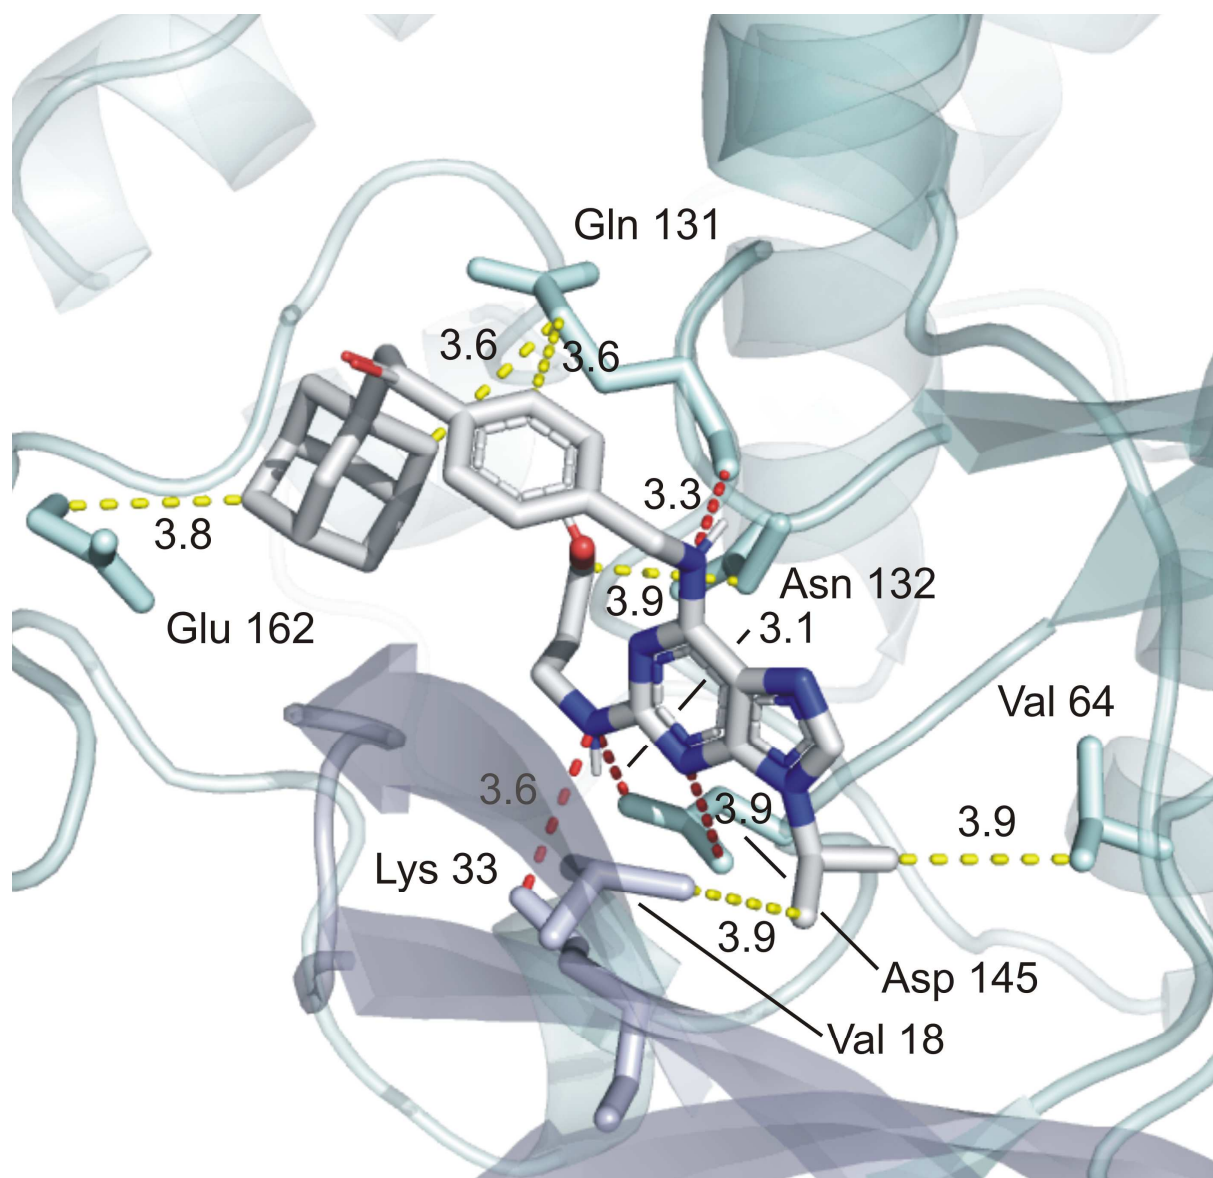

**Figure S44** Purine **4j** docked into CDK2 active site. Intermolecular contacts were analysed using PLIP. Non-polar contacts and H-bonds are shown as yellow and red dashed lines, respectively. Lengths are given in Å.



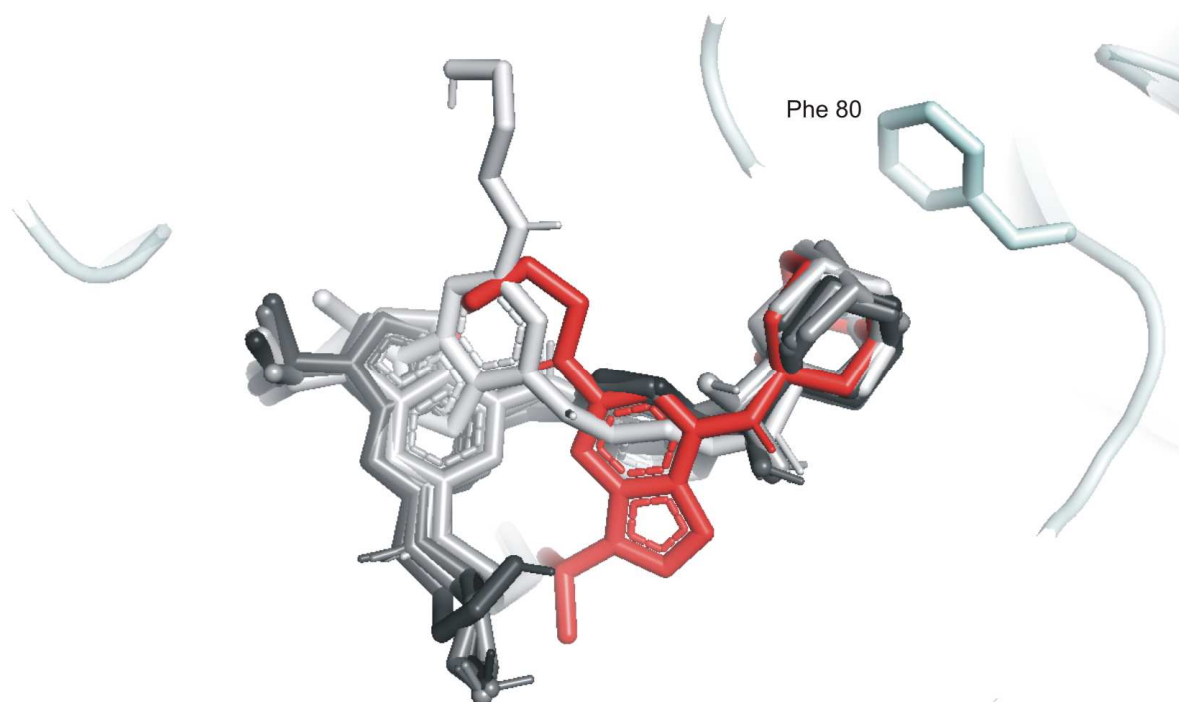

**Figure 45** Superposition of the previously published adamantylaminopurine derivative **4m** (red) and the ligands **4a–4f** (grayscale) inside the binding site of CDK2.



**Table S1** Intermolecular contacts<sup>a</sup> of purines **4a–4m** in active site of CDK2 as identified using PLIP.

|                             | <b>4a</b>            | <b>(R)-4b</b>        | <b>(S)-4b</b>                | <b>4c</b>    | <b>4d</b>            | <b>(R)-4e</b>        | <b>(S)-4e</b>        | purine               |              | <b>(S)-4g</b> | <b>4h</b> | <b>4i</b>    | <b>4j</b>                    | <b>4k</b>    | <b>4l</b> | <b>4m</b>    |
|-----------------------------|----------------------|----------------------|------------------------------|--------------|----------------------|----------------------|----------------------|----------------------|--------------|---------------|-----------|--------------|------------------------------|--------------|-----------|--------------|
| -ΔG [kJ mol <sup>-1</sup> ] | 44.3                 | 40.1                 | 41.4                         | 41.8         | 42.2                 | 40.5                 | 40.1                 | 41.4                 | 40.5         | 40.5          | 41.0      | 41.0         | 37.2                         | 33.4         | 35.5      | 35.1         |
| residue                     | distance [Å]         |                      |                              |              |                      |                      |                      |                      |              |               |           |              |                              |              |           |              |
| Ile 10                      | 3.19                 | 3.58                 | 3.40                         | 3.60         |                      |                      |                      |                      | 3.69         |               | 3.59      |              |                              | 3.41         |           |              |
| Gly 11                      |                      |                      |                              |              |                      |                      |                      |                      |              |               |           |              |                              | 3.65         |           |              |
| Glu 12                      |                      |                      | 3.60                         |              |                      |                      |                      |                      |              |               |           |              |                              | 4.00         |           |              |
| Gly 13                      |                      |                      |                              |              | 3.80                 | 3.91                 | 3.83                 | 3.98                 |              |               |           |              |                              |              |           |              |
| Thr 14                      | 2.37<br>3.51<br>3.73 |                      |                              |              |                      |                      |                      |                      | 2.98<br>3.14 |               |           |              |                              |              |           |              |
| Val 18                      | 3.30<br>3.95         | 3.61<br>3.85         | 3.71<br>3.80                 | 3.62<br>3.66 | 3.69                 | 3.38<br>3.63         | 3.52<br>3.70         | 3.48<br>3.83         |              |               |           |              | 3.86                         | 3.61         |           | 3.52<br>3.60 |
| Ala 31                      | 3.43                 |                      |                              |              |                      |                      |                      |                      | 3.60         | 3.63          | 3.72      |              |                              |              |           |              |
| Lys 33                      |                      | 3.08                 | 3.10                         | 3.39         | 3.22<br>5.88         | 3.23<br>5.78         | 3.17<br>3.17         | 3.23<br>5.80         |              | 3.97          | 3.97      |              | 3.64                         |              |           | 3.19         |
| Val 64                      |                      | 3.61                 |                              | 3.79         | 3.58                 | 3.55                 | 3.58                 | 3.48                 |              |               |           | 3.98         | 3.86                         | 3.73         |           | 3.74         |
| Phe 80                      | 3.22<br>3.57<br>3.75 | 3.28<br>3.56<br>3.77 | 3.35<br>3.36<br>3.75<br>3.96 | 3.48<br>3.63 | 3.35<br>3.60<br>3.76 | 3.22<br>3.68<br>3.91 | 3.46<br>3.49<br>3.98 | 3.34<br>3.50<br>3.77 |              | 3.68<br>3.63  | 3.68      | 3.52<br>3.73 |                              | 3.53<br>3.79 |           |              |
| Phe 82                      |                      |                      |                              |              |                      |                      |                      |                      |              |               |           |              |                              | 3.62         |           |              |
| Leu 83                      |                      |                      |                              |              |                      |                      |                      |                      | 2.97         |               |           | 2.92         |                              | 2.94<br>3.72 |           |              |
| His 84                      |                      |                      |                              |              |                      |                      |                      |                      | 3.77         | 3.82          | 3.78      |              |                              |              |           |              |
| Gln 85                      |                      |                      |                              |              |                      |                      |                      |                      | 4.00         | 3.90          | 3.90      |              |                              |              |           |              |
| Asp 86                      |                      |                      |                              |              | 3.22                 |                      | 3.05                 | 2.82                 |              |               |           |              |                              |              |           |              |
| Lys 89                      |                      |                      |                              |              |                      |                      |                      |                      |              |               |           |              |                              |              |           |              |
| Lys 129                     | 3.95                 |                      | 3.99                         |              |                      |                      |                      |                      |              |               |           |              |                              |              |           |              |
| Gln 131                     | 2.98                 | 3.53                 |                              | 3.59         | 3.64<br>3.98         | 3.53                 | 3.96                 | 3.59                 |              |               |           | 3.78         | 3.33<br>3.60<br>3.90<br>3.87 |              |           |              |
| Asn 132                     | 3.28                 |                      |                              |              |                      |                      |                      |                      |              |               |           |              |                              |              |           | 3.89         |
| Leu 134                     | 3.45                 | 3.51                 | 2.87<br>3.83                 | 3.13         | 3.22                 | 3.49                 | 3.25                 |                      | 3.77         | 3.84          | 3.85      |              |                              |              |           |              |
| Ala 144                     |                      | 3.13                 | 3.27                         | 3.18         | 3.45                 | 3.44                 | 3.26                 | 3.42                 |              |               |           | 3.65         |                              |              |           | 3.20         |
| Asp 145                     | 3.09<br>3.99         |                      |                              |              |                      |                      |                      |                      |              |               |           |              | 3.87<br>3.13                 |              |           |              |
| Glu 162                     |                      |                      |                              | 3.74         |                      | 3.73                 |                      | 3.85                 | 3.98         |               |           | 3.75         | 3.82                         |              |           |              |
| Val 163                     |                      |                      |                              |              |                      |                      |                      |                      |              | 3.97          |           |              |                              |              |           |              |
| Val 164                     |                      | 3.88                 | 3.79                         | 3.55         | 3.61                 | 3.84                 | 3.58                 | 3.95                 | 3.53         |               | 3.51      | 3.49         |                              |              |           |              |

<sup>a</sup> Non-polar contacts in black (given as C···C distance), H-bonds in red (given as D···A distance), cation- $\pi$  interactions in blue (given as distance between centre of gravity of aromatic C-atoms and cation).

**Table S2** Intermolecular contacts<sup>a</sup> of purines **4a–4l** in active site of CDK2/cyclin E as identified using PLIP.

|                                      | purine               |                      |                      |                      |                      |                      |               |              |               |                      |                      |                      |                      |              |                      |                    |
|--------------------------------------|----------------------|----------------------|----------------------|----------------------|----------------------|----------------------|---------------|--------------|---------------|----------------------|----------------------|----------------------|----------------------|--------------|----------------------|--------------------|
|                                      | <b>4a</b>            | <b>(R)-4b</b>        | <b>(S)-4b</b>        | <b>4c</b>            | <b>4d</b>            | <b>(R)-4e</b>        | <b>(S)-4e</b> | <b>4f</b>    | <b>(R)-4g</b> | <b>S-4g</b>          | <b>4h</b>            | <b>4i</b>            | <b>4j</b>            | <b>4k</b>    | <b>4l</b>            | <b>dinaciclilb</b> |
| - $\Delta G$ [kJ mol <sup>-1</sup> ] |                      | 37.6                 | 37.2                 | 36.8                 | 36.8                 | 35.1                 | 39.7          | 37.6         | 37.6          | 39.7                 | 38.0                 | 38.0                 | 39.3                 | 37.3         | 35.1                 | 41.4               |
| residue                              | distance [Å]         |                      |                      |                      |                      |                      |               |              |               |                      |                      |                      |                      |              |                      |                    |
| Glu 9                                |                      |                      |                      |                      | 3.92                 | 3.37                 |               |              | 3.53          |                      |                      |                      |                      |              |                      |                    |
| Lys 10                               |                      |                      |                      |                      |                      | 2.89                 |               |              |               |                      |                      |                      |                      |              |                      |                    |
| Ile 11                               | 2.96                 | 3.55                 | 3.63                 |                      | 3.41                 | 3.25                 | 3.42          |              | 3.56          |                      | 3.53                 | 2.93<br>3.97         | 3.57<br>3.85         |              |                      | 3.62<br>3.76       |
| Gly 12                               | 3.95                 |                      |                      |                      |                      |                      |               |              |               |                      |                      |                      |                      |              |                      |                    |
| Glu 13                               |                      |                      |                      |                      |                      |                      |               |              | 3.94          |                      | 3.91                 |                      |                      |              |                      |                    |
| Gly 14                               |                      |                      |                      |                      |                      |                      |               |              |               |                      |                      |                      |                      |              | 3.27                 | 3.98               |
| Val 19                               | 3.43<br>3.57         | 3.62                 | 3.68                 | 3.54                 | 3.33<br>3.43<br>3.39 | 3.13<br>3.29<br>3.98 |               |              | 3.65          | 3.52<br>3.83         | 3.63                 | 3.39<br>3.49         | 3.49<br>3.76<br>3.88 | 3.70         | 3.52                 | 3.77               |
| Lys 21                               |                      |                      |                      |                      |                      |                      |               |              |               |                      |                      |                      |                      |              |                      |                    |
| Ala 32                               |                      |                      |                      |                      |                      |                      |               |              |               | 3.87                 |                      |                      |                      |              |                      |                    |
| Val 65                               |                      |                      |                      |                      |                      |                      | 3.31          | 3.38         |               | 3.97<br>3.98<br>3.49 |                      |                      | 3.88                 | 3.72<br>3.73 | 3.89                 |                    |
| Phe 81                               | 3.55<br>3.69<br>3.76 | 3.71<br>3.72<br>3.88 | 3.66<br>3.71<br>3.83 | 3.62<br>3.64<br>3.77 | 3.46<br>3.72         | 3.68<br>3.84         | 3.41          | 3.56<br>3.82 | 3.57<br>3.68  | 3.58<br>3.71<br>3.96 | 3.51<br>3.67<br>3.71 | 3.47<br>3.50         | 3.49<br>3.72<br>3.90 | 3.77         | 3.45<br>3.68         | 3.76               |
| Glu 82                               |                      |                      |                      |                      |                      |                      |               |              |               | 2.92                 |                      |                      |                      |              |                      |                    |
| Phe 83                               | 3.71                 |                      |                      |                      |                      | 3.55                 | 3.57          | 3.59         | 3.83<br>3.89  |                      |                      | 3.96                 | 3.76                 |              | 3.67                 | 3.71               |
| Leu 84                               |                      | 2.44                 | 2.45<br>2.94         | 2.43<br>3.00<br>3.98 |                      |                      |               | 3.93         | 3.25<br>3.98  | 2.59<br>3.02<br>3.85 | 3.36                 | 3.08<br>3.09<br>3.62 | 2.80<br>4.06         |              | 2.97                 | 2.96               |
| His 85                               |                      |                      |                      |                      |                      |                      |               |              |               |                      |                      |                      |                      |              |                      |                    |
| Asp 87                               | 2.75<br>3.61         | 2.93                 | 2.99                 | 2.91                 | 2.63<br>4.06         | 2.69                 | 2.86          |              |               | 2.71<br>3.97         |                      | 3.27                 | 2.42                 |              | 3.04<br>3.31<br>3.78 |                    |
| Lys 90                               | 2.94                 |                      |                      |                      | 3.33                 | 3.19                 |               | 3.82         |               | 2.97                 |                      | 3.57                 | 3.58                 |              |                      |                    |
| Gln 132                              |                      |                      |                      | 3.99                 |                      |                      | 3.78          | 3.87<br>2.94 |               | 2.99                 |                      |                      |                      |              |                      | 3.75               |
| Asn 133                              |                      | 3.20                 | 3.94                 |                      | 4.03                 |                      |               |              |               |                      |                      |                      |                      |              |                      |                    |
| Leu 135                              | 3.09<br>3.84         | 3.38<br>3.98         | 3.41                 | 2.93<br>3.60         | 3.19<br>3.36         | 3.36<br>3.37         | 3.60          | 3.71         |               | 2.67                 |                      | 3.38<br>3.56         | 3.78<br>3.88         | 3.35         |                      | 3.64               |
| Ala 145                              |                      |                      |                      |                      |                      |                      |               |              |               | 3.18                 |                      |                      |                      |              |                      |                    |
| Asp 146                              |                      |                      |                      |                      |                      |                      |               |              |               | 3.84                 |                      |                      |                      |              |                      |                    |

<sup>a</sup> Non-polar contacts in black (given as C···C distance), H-bonds in red (given as D···A distance).
